# Supplementary material for: Selectively Halogenated Flavonolignans—Preparation and Antibacterial Activity
Source: MDPI journal article supplement (doi:10.3390/ijms232315121), 2022-12-01
Supplement: s1 [file s1]

## Biological Activity

Table S1. The antiradical and reducing capacity of flavonoids and their halogenated derivatives.

| Compound                               | ABTS [CEAC] <sup>a</sup>     |       | FCR [GAE] <sup>b</sup>       |       | FRAP [Fe <sup>2+</sup> eq] <sup>c</sup> |       | DPPH (IC <sub>50</sub> ) [ $\mu$ M] <sup>d</sup> |       |  |
|----------------------------------------|------------------------------|-------|------------------------------|-------|-----------------------------------------|-------|--------------------------------------------------|-------|--|
| <b>Taxifolin (1)</b>                   | 1.08 $\pm$ 0.02              | B     | 1.92 $\pm$ 0.05              | D     | 1.45 $\pm$ 0.07                         | F     | 2.91 $\pm$ 0.19                                  | A     |  |
| 6-Bromotaxifolin (7)                   | 0.97 $\pm$ 0.03              | **    | 1.70 $\pm$ 0.01              | ***   | 1.33 $\pm$ 0.03                         |       | 7.77 $\pm$ 0.35                                  | ***** |  |
| 6,8-Dibromotaxifolin (8)               | 1.04 $\pm$ 0.05              |       | 2.08 $\pm$ 0.04              | *     | 2.20 $\pm$ 0.03                         | ***** | 4.37 $\pm$ 0.22                                  | ***   |  |
| <b>Quercetin (2)</b>                   | 2.87 $\pm$ 0.23              | E     | 2.33 $\pm$ 0.05              | E     | 2.84 $\pm$ 0.02                         | G     | 2.06 $\pm$ 0.07                                  | A     |  |
| 8-Bromoquercetin (9)                   | 2.92 $\pm$ 0.28              |       | 2.01 $\pm$ 0.06              | ****  | 2.44 $\pm$ 0.06                         | ***** | 2.44 $\pm$ 0.09                                  | *     |  |
| 6,8-Dibromoquercetin (10)              | 2.63 $\pm$ 0.19              |       | 1.70 $\pm$ 0.02              | ***** | 3.31 $\pm$ 0.14                         | **    | 3.59 $\pm$ 0.22                                  | ***   |  |
| <b>Silybin A (3a)</b>                  | 0.50 $\pm$ 0.03              | A     | 1.35 $\pm$ 0.06              | B     | 0.071 $\pm$ 0.003                       | A     | 321.8 $\pm$ 11.5                                 | E     |  |
| 6-Bromosilybin A (11)                  | 0.60 $\pm$ 0.04              |       | 1.06 $\pm$ 0.04              | ****  | 0.072 $\pm$ 0.002                       |       | 472.1 $\pm$ 43.1                                 |       |  |
| 8-Bromosilybin A (19)                  | 0.68 $\pm$ 0.03              | ***   | 1.01 $\pm$ 0.02              | ***** | 0.057 $\pm$ 0.002                       | ***   | > 500                                            |       |  |
| 6,8-Dibromosilybin A (12)              | 0.30 $\pm$ 0.04              | ***   | 0.85 $\pm$ 0.03              | ***** | 0.084 $\pm$ 0.004                       | *     | 383.1 $\pm$ 17.3                                 | *     |  |
| 6,8-Diiodosilybin A (25)               | 0.41 $\pm$ 0.01              | *     | 0.95 $\pm$ 0.01              | ***** | 0.053 $\pm$ 0.003                       | ***** | > 500                                            |       |  |
| 6,8,21-Tribromosilybin A (21)          | 0.12 $\pm$ 0.02              | ***** | 0.99 $\pm$ 0.02              | ***** | 0.079 $\pm$ 0.002                       |       | 375.2 $\pm$ 32.6                                 |       |  |
| <b>Silybin B (3b)</b>                  | 0.55 $\pm$ 0.05              | A     | 1.39 $\pm$ 0.08              | B     | 0.078 $\pm$ 0.004                       | A     | 259.1 $\pm$ 8.6                                  | D     |  |
| 6-Bromosilybin B (13)                  | 0.75 $\pm$ 0.02              | ***   | 1.17 $\pm$ 0.04              | *     | 0.063 $\pm$ 0.001                       | ***   | 354.4 $\pm$ 20.1                                 | *     |  |
| 6-Chlorosilybin B (28)                 | 0.71 $\pm$ 0.02              | **    | 1.25 $\pm$ 0.01              |       | 0.050 $\pm$ 0.002                       | ***** | > 500                                            |       |  |
| 8-Bromosilybin B (20)                  | 0.47 $\pm$ 0.01              |       | 1.10 $\pm$ 0.02              | **    | 0.056 $\pm$ 0.002                       | ***** | > 500                                            |       |  |
| 8-Iodosilybin B (24)                   | 0.47 $\pm$ 0.04              |       | 1.01 $\pm$ 0.02              | ***   | 0.079 $\pm$ 0.002                       |       | 97.1 $\pm$ 1.2                                   | ***   |  |
| 6,8-Dibromosilybin B (14)              | 0.35 $\pm$ 0.04              | **    | 1.10 $\pm$ 0.05              | **    | 0.081 $\pm$ 0.004                       |       | 255.9 $\pm$ 8.9                                  |       |  |
| 6,8-Diiodosilybin B (26)               | 0.48 $\pm$ 0.01              |       | 0.84 $\pm$ 0.04              | ***** | 0.048 $\pm$ 0.001                       | ***** | 249.3 $\pm$ 18.6                                 |       |  |
| 6,8,21-Tribromosilybin B (22)          | 0.17 $\pm$ 0.01              | ***** | 1.01 $\pm$ 0.04              | *     | 0.062 $\pm$ 0.002                       | ****  | 237.5 $\pm$ 3.2                                  |       |  |
| <b>2,3-Dehydrosilybin AB (4)</b>       | 1.46 $\pm$ 0.08              | C     | 1.68 $\pm$ 0.03              | C     | 0.72 $\pm$ 0.03                         | C     | 14.4 $\pm$ 0.2                                   | B     |  |
| 8-Bromo-2,3-dehydrosilybin AB (16)     | 1.15 $\pm$ 0.03              | **    | 1.56 $\pm$ 0.03              | ***   | 0.19 $\pm$ 0.01                         | ***** | 13.4 $\pm$ 0.1                                   | *     |  |
| 6,8-Dibromo-2,3-dehydrosilybin AB (17) | 1.49 $\pm$ 0.04              |       | 1.50 $\pm$ 0.02              | ***** | 0.54 $\pm$ 0.04                         | ***   | 11.7 $\pm$ 0.5                                   | *     |  |
| <b>Silychristin A (5)</b>              | 1.73 $\pm$ 0.02              | C     | 1.87 $\pm$ 0.07              | D     | 0.25 $\pm$ 0.02                         | B     | 47.2 $\pm$ 1.0                                   | C     |  |
| 6,8-Dibromosilychristin A (15)         | 1.28 $\pm$ 0.02              | ***** | 2.03 $\pm$ 0.05              |       | 0.34 $\pm$ 0.03                         | *     | 106.2 $\pm$ 5.8                                  | **    |  |
| 6,8-Diiodosilychristin A (27)          | 1.13 $\pm$ 0.01              | ***** | 1.79 $\pm$ 0.05              |       | 0.21 $\pm$ 0.01                         |       | 168.0 $\pm$ 12.3                                 | **    |  |
| 6,8,20-Tribromosilychristin A (23)     | 1.16 $\pm$ 0.04              | *     | 1.57 $\pm$ 0.04              | ***   | 0.28 $\pm$ 0.02                         |       | 164.0 $\pm$ 2.2                                  | ***** |  |
| <b>2,3-Dehydrosilychristin A (6)</b>   | 2.10 $\pm$ 0.06              | D     | 2.43 $\pm$ 0.02              | E     | 1.16 $\pm$ 0.04                         | E     | 10.8 $\pm$ 0.4                                   | AB    |  |
| 8-Bromo-2,3-dehydrosilychristin A (18) | 1.41 $\pm$ 0.03              | ***** | 2.22 $\pm$ 0.01              | ***** | 0.90 $\pm$ 0.08                         | *     | 11.1 $\pm$ 0.6                                   |       |  |
| <b>Positive control (PC)</b>           | 1.01 $\pm$ 0.01 <sup>e</sup> | B     | 1.00 $\pm$ 0.02 <sup>f</sup> | A     | 1.01 $\pm$ 0.01 <sup>g</sup>            | D     | 3.5 $\pm$ 0.1 <sup>h</sup>                       | AB    |  |

Data are expressed as mean  $\pm$  standard error of at least three independently performed measurements performed in triplicates. <sup>a</sup> 2,2'-Azino-bis-(3-ethylbenzothiazoline-6-sulfonic acid) cation radical scavenging (vitamin C equivalent antioxidant capacity); <sup>b</sup> Folin-Ciocalteu reagent reduction (gallic acid equivalents); <sup>c</sup> ferric reducing antioxidant power (Fe<sup>2+</sup> equivalents); <sup>d</sup> 1,1-diphenyl-2-picrylhydrazyl radical scavenging; <sup>e</sup> vitamin C; <sup>f</sup> gallic acid; <sup>g</sup> Fe<sup>2+</sup>; <sup>h</sup> Trolox. ANOVA with Duncan's post hoc test was used for the comparison of parent compounds and positive control for each essay independently (different capital letters indicate significant differences). T-test was used for the comparison of halogenated derivatives and their parent compounds (\*  $p \leq 0.05$ , \*\*  $p \leq 0.01$ , \*\*\*  $p \leq 0.005$ , \*\*\*\*  $p \leq 0.001$ , \*\*\*\*\*  $p \leq 0.0005$ ).

**Table S2.** The capacity of flavonoids and their halogenated derivatives to inhibit lipid peroxidation.

| Compound                               | ILP IC50 [ $\mu$ M] <sup>a</sup> |       |
|----------------------------------------|----------------------------------|-------|
| <b>Taxifolin (1)</b>                   | 16.3 $\pm$ 1.1                   | A     |
| 6-Bromotaxifolin (7)                   | 200.6 $\pm$ 8.4                  | ***** |
| 6,8-Dibromotaxifolin (8)               | 22.5 $\pm$ 1.0                   | ***** |
| <b>Quercetin (2)</b>                   | 39.0 $\pm$ 2.9                   | B, C  |
| 8-Bromoquercetin (9)                   | 38.3 $\pm$ 1.9                   |       |
| 6,8-Dibromoquercetin (10)              | 28.6 $\pm$ 1.1                   | ***   |
| <b>Silybin A (3a)</b>                  | 213.3 $\pm$ 11.3                 | E     |
| 6-Bromosilybin A (11)                  | 448.6 $\pm$ 31.0                 | ***** |
| 6,8-Dibromosilybin A (12)              | 710.3 $\pm$ 37.8                 | ***** |
| 6,8,21-Tribromosilybin A (21)          | 212.7 $\pm$ 15.0                 |       |
| <b>Silybin B (3b)</b>                  | 291.2 $\pm$ 8.7                  | F     |
| 6-Bromosilybin B (13)                  | 727.8 $\pm$ 57.5                 | ***** |
| 6,8-Dibromosilybin B (14)              | 378.4 $\pm$ 25.4                 | **    |
| 6,8,21-Tribromosilybin B (22)          | 255.2 $\pm$ 17.8                 |       |
| <b>2,3-Dehydrosilybin AB (4)</b>       | 34.6 $\pm$ 2.3                   | B     |
| 8-Bromo-2,3-dehydrosilybin AB (16)     | 49.2 $\pm$ 1.9                   | ***** |
| 6,8-Dibromo-2,3-dehydrosilybin AB (17) | 56.7 $\pm$ 1.6                   | ***** |
| <b>Silychristin A (5)</b>              | 128.8 $\pm$ 4.6                  | D     |
| 6,8-Dibromosilychristin A (15)         | 459.1 $\pm$ 33.9                 | ***** |
| 6,8,20-Tribromosilychristin A (23)     | 324.1 $\pm$ 22.6                 | ***** |
| 6,8-Diiodosilychristin A (27)          | 97.2 $\pm$ 3.5                   | ***** |
| <b>2,3-Dehydrosilychristin A (6)</b>   | 51.9 $\pm$ 2.2                   | C     |
| 8-Bromo-2,3-dehydrosilychristin A (18) | 60.1 $\pm$ 2.7                   | *     |
| <b>Trolox (PC)</b>                     | 32.7 $\pm$ 2.4                   | B     |

Data are presented as mean  $\pm$  standard error of at least three independently repeated measurements in triplicates. <sup>a</sup> Inhibition of lipid peroxidation of male rat microsomes induced by tert-butyl hydroperoxide. ANOVA with Duncan's post hoc test was used for the comparison of parent compounds and positive control (PC, different capital letters indicate significant differences). T-test was used for the comparison of the halogenated derivative and its parent compound (\*  $p \leq 0.05$ , \*\*  $p \leq 0.01$ , \*\*\*  $p \leq 0.005$ , \*\*\*\*  $p \leq 0.001$ , \*\*\*\*\*  $p \leq 0.0005$ ). PC—positive control.

**Table S3.** Cytotoxicity of halogenated flavonoids. Cytotoxicity is defined as the concentration of flavonoids and their halogenated derivatives halving the viability (IC50,  $\mu\text{M}$ ) of human dermal fibroblasts (HDF) and doxorubicin-resistant human ovarian carcinoma (HOC/DOX).

| Compound                                  | HDF IC50<br>[μM] |       | HOC/DOX IC50 [μM] | SI    |              |
|-------------------------------------------|------------------|-------|-------------------|-------|--------------|
| <b>Taxifolin (1)</b>                      | 93.8 ± 3.7       | C, D  | 183.2 ± 17.2      | C     | 0.51 ± 0.07  |
| 6-Bromotaxifolin (7)                      | 122.2 ± 4.1      | ***   | 347.1 ± 26.8      | *     | 0.35 ± 0.04  |
| 6,8-Dibromotaxifolin (8)                  | 157.8 ± 1.6      | ****  | 233.2 ± 7.4       |       | 0.68 ± 0.03  |
| <b>Quercetin (2)</b>                      | 54.8 ± 2.7       | B     | 182.3 ± 1.1       | C     | 0.30 ± 0.02  |
| 8-Bromoquercetin (9)                      | 131.5 ± 12.7     | *     | 171.3 ± 1.2       | ***   | 0.77 ± 0.08  |
| 6,8-Dibromoquercetin (10)                 | 55.0 ± 1.9       |       | 54.2 ± 0.3        | ***** | 1.02 ± 0.04  |
| <b>Silybin A (3a)</b>                     | 108.6 ± 4.6      | D, E  | 236.5 ± 10.6      | D     | 0.46 ± 0.04  |
| 6-Bromosilybin A (11)                     | 95.6 ± 3.0       |       | 185.6 ± 4.6       | *     | 0.51 ± 0.03  |
| 8-Bromosilybin A (19)                     | 77.4 ± 1.1       | *     | 202.1 ± 1.1       | *     | 0.38 ± 0.01  |
| 6,8-Dibromosilybin A (12)                 | 102.2 ± 3.0      |       | 303.9 ± 27.1      |       | 0.34 ± 0.04  |
| 6,8,21-Tribromosilybin A (21)             | 75.0 ± 2.4       | **    | 200.6 ± 0.2       | *     | 0.37 ± 0.01  |
| <b>Silybin B (3b)</b>                     | 83.3 ± 5.4       | C     | 202.4 ± 0.4       | C     | 0.41 ± 0.03  |
| 6-Bromosilybin B (13)                     | 76.4 ± 1.1       |       | 161.8 ± 3.8       | **    | 0.47 ± 0.02  |
| 6-Chlorosilybin B (28)                    | 146.7 ± 2.4      | ***** | 272.4 ± 5.5       | ****  | 0.54 ± 0.02  |
| 8-Bromosilybin B (20)                     | 97.9 ± 4.4       |       | 226.6 ± 9.2       |       | 0.43 ± 0.04  |
| 6,8-Dibromosilybin B (14)                 | 127.6 ± 1.8      | ***   | 231.0 ± 1.7       | ***   | 0.55 ± 0.01  |
| 6,8,21-Tribromosilybin B (22)             | 85.8 ± 1.1       |       | 183.1 ± 9.4       |       | 0.47 ± 0.03  |
| <b>2,3-Dehydrosilybin AB (4)</b>          | 16.8 ± 0.5       | A     | 23.5 ± 1.5        | A     | 0.71 ± 0.07  |
| 8-Bromo-2,3-dehydrosilybin AB (16)        | 16.9 ± 0.6       |       | 39.4 ± 3.4        | *     | 0.43 ± 0.05  |
| 6,8-Dibromo-2,3-dehydrosilybin AB<br>(17) | 41.7 ± 1.0       | ***** | 91.3 ± 1.6        | ***** | 0.46 ± 0.02  |
| <b>Silychristin A (5)</b>                 | 114.9 ± 11.0     | E     | 204.7 ± 15.6      | C     | 0.56 ± 0.10  |
| 6,8-Dibromosilychristin A (15)            | 175.5 ± 0.4      | *     | 248.8 ± 12.5      |       | 0.71 ± 0.04  |
| <b>2,3-Dehydrosilychristin A (6)</b>      | 44.2 ± 2.1       | B     | 75.7 ± 8.6        | B     | 0.58 ± 0.09  |
| 8-Bromo-2,3-dehydrosilychristin A<br>(18) | 66.7 ± 5.6       | *     | 208.6 ± 1.8       | ***   | 0.32 ± 0.03  |
| <b>Indomethacin (PC)</b>                  | 221.6 ± 13.3     | F     | 17.1 ± 0.6        | A     | 12.94 ± 1.26 |

The data are presented as the average of four repetitions with the standard error. T-test was used for the comparison of the halogenated derivative and its parent compound (\*  $p \leq 0.05$ , \*\*  $p \leq 0.01$ , \*\*\*  $p \leq 0.005$ , \*\*\*\*  $p \leq 0.001$ , \*\*\*\*\*  $p \leq 0.0005$ ). ANOVA with Duncan's post hoc test was used for the comparison of parent compound toxicities for each cell line independently (different capital letters indicate significant differences). The selectivity index (SI) represents the ratio between toxicity and anticancer activity (HDF and HOC/DOX). PC – positive control.

**Table S4.** Anti-inflammatory activity of flavonoids and their halogenated derivatives. The anti-inflammatory activity is presented as the concentration [ $\mu\text{M}$ ] of flavonoids halving the nitric oxide (NO) production ( $\text{IC}_{50}$ ) in lipopolysaccharide-stimulated macrophages (RAW 264.7).

| Compound                               | NO Production                      | t-test |               |
|----------------------------------------|------------------------------------|--------|---------------|
|                                        | $\text{IC}_{50}$ [ $\mu\text{M}$ ] | p      | $p \leq 0.05$ |
| Taxifolin (1)                          | $52.4 \pm 1.2$                     | 0.5959 |               |
| 6-Bromotaxifolin (7)                   | $78.4 \pm 7.8$                     | 0.0569 |               |
| 6,8-Dibromotaxifolin (8)               | $62.2 \pm 4.2$                     | 0.1496 |               |
| Quercetin (2)                          | $14.6 \pm 2.1$                     | 0.0014 | *             |
| 8-Bromoquercetin (9)                   | >100                               |        |               |
| 6,8-Dibromoquercetin (10)              | $40.6 \pm 2.6$                     | 0.0786 |               |
| Silybin A (3a)                         | $53.9 \pm 4.9$                     | 0.6446 |               |
| 6-Bromosilybin A (11)                  | $40.0 \pm 3.4$                     | 0.0122 | *             |
| 8-Bromosilybin A (19)                  | $36.4 \pm 1.7$                     | 0.0162 | *             |
| 6,8-Dibromosilybin A (12)              | $73.9 \pm 5.8$                     | 0.1930 |               |
| 6,8,21-Tribromosilybin A (21)          | $70.4 \pm 1.7$                     | 0.0023 | *             |
| Silybin B (3b)                         | $55.6 \pm 5.5$                     | 0.3993 |               |
| 6-Bromosilybin B (13)                  | $37.0 \pm 2.4$                     | 0.0468 | *             |
| 6-Chlorosilybin B (28)                 | $52.4 \pm 4.5$                     | 0.4386 |               |
| 8-Bromosilybin B (20)                  | $38.0 \pm 2.2$                     | 0.0071 | *             |
| 6,8-Dibromosilybin B (14)              | $90.4 \pm 4.6$                     | 0.0123 | *             |
| 6,8,21-Tribromosilybin B (22)          | >100                               |        |               |
| 2,3-Dehydrosilybin AB (4)              | $27.9 \pm 0.5$                     | 0.0000 | *             |
| 8-Bromo-2,3-dehydrosilybin AB (16)     | >25                                |        |               |
| 6,8-Dibromo-2,3-dehydrosilybin AB (17) | $44.4 \pm 2.4$                     | 0.1855 |               |
| Silychristin A (5)                     | $72.5 \pm 5.4$                     | 0.0567 |               |
| 6,8-Dibromosilychristin A (15)         | >100                               |        |               |
| 2,3-Dehydrosilychristin A (6)          | $42.1 \pm 2.7$                     | 0.0903 |               |
| 8-Bromo-2,3-dehydrosilychristin A (18) | $32.6 \pm 1.8$                     | 0.0001 | *             |
| Indomethacin (PC)                      | $51.3 \pm 0.6$                     |        |               |

The data are presented as the average of four repetitions with the standard error. T-test was used for the comparison of each halogenated derivative with the positive control (\*  $p \leq 0.05$ ). The highest tested concentration was 100  $\mu\text{M}$  with except for 8-bromodehydrosilybin AB (16), where a concentration higher than 25  $\mu\text{M}$  decreased the cell viability. PC – positive control.

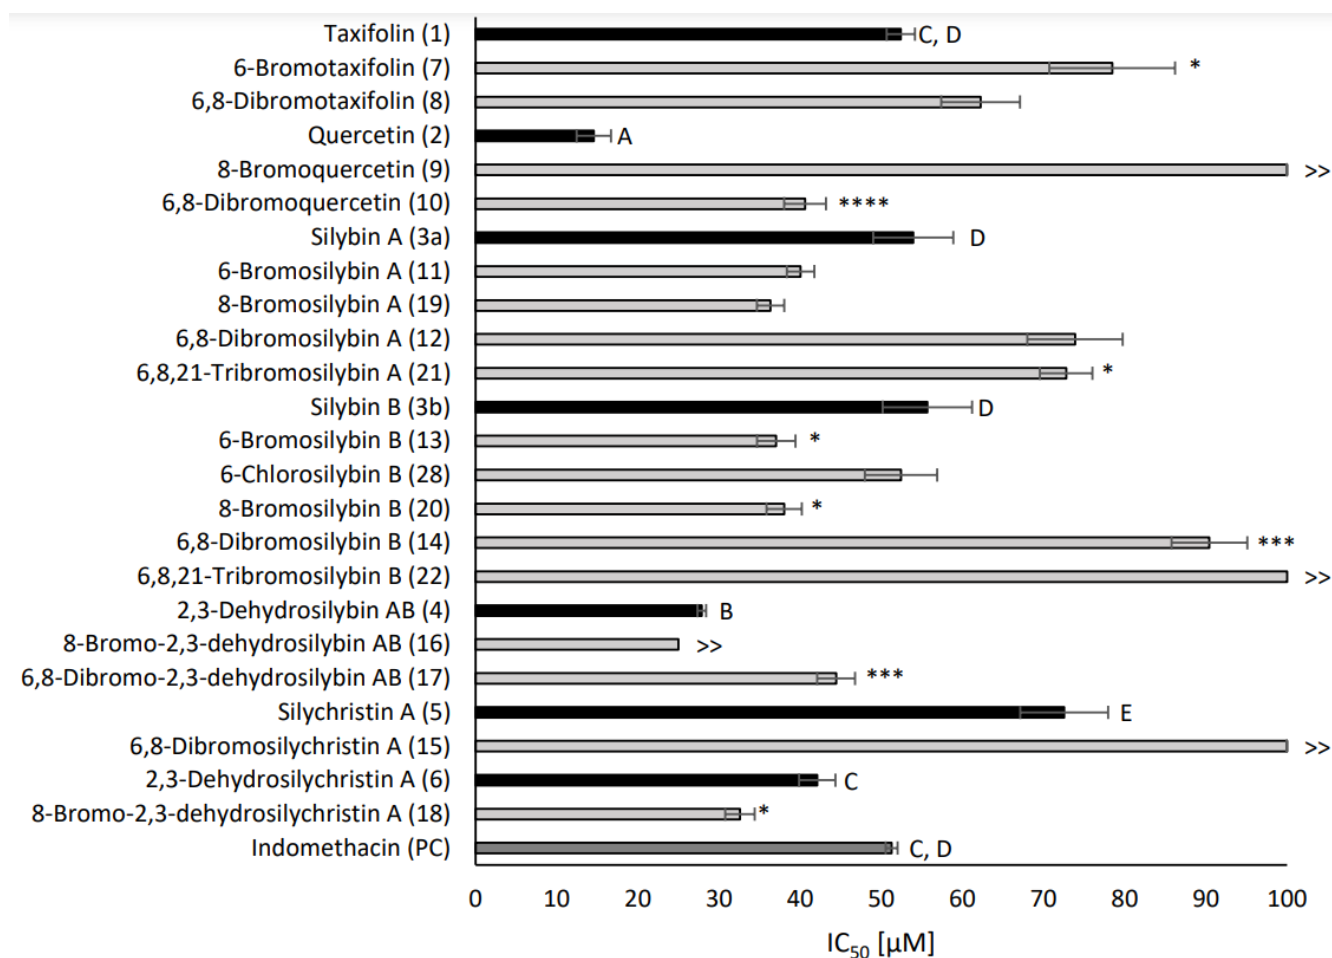

**Figure S1.** Anti-inflammatory activity of flavonoids and their halogenated derivatives. The anti-inflammatory activity is presented as the concentration [μM] of flavonoids halving the nitric oxide production (IC<sub>50</sub>) in lipopolysaccharide-stimulated macrophages (RAW 264.7). The data are presented as the average of four repetitions with the standard error. T-test was used for the comparison of each halogenated derivative and its parent compound (\*  $p \leq 0.05$ , \*\*  $p \leq 0.01$ , \*\*\*  $p \leq 0.005$ , \*\*\*\*  $p \leq 0.001$ ). ANOVA with Duncan's post hoc test was used for the comparison of parent compounds and positive control (PC, different capital letters indicate significant differences). The highest tested concentration was 100 μm except for 8-bromo-2,3-dehydrosilybin AB (16), where a concentration higher than 25 μm decreased the cell viability. PC—positive control.

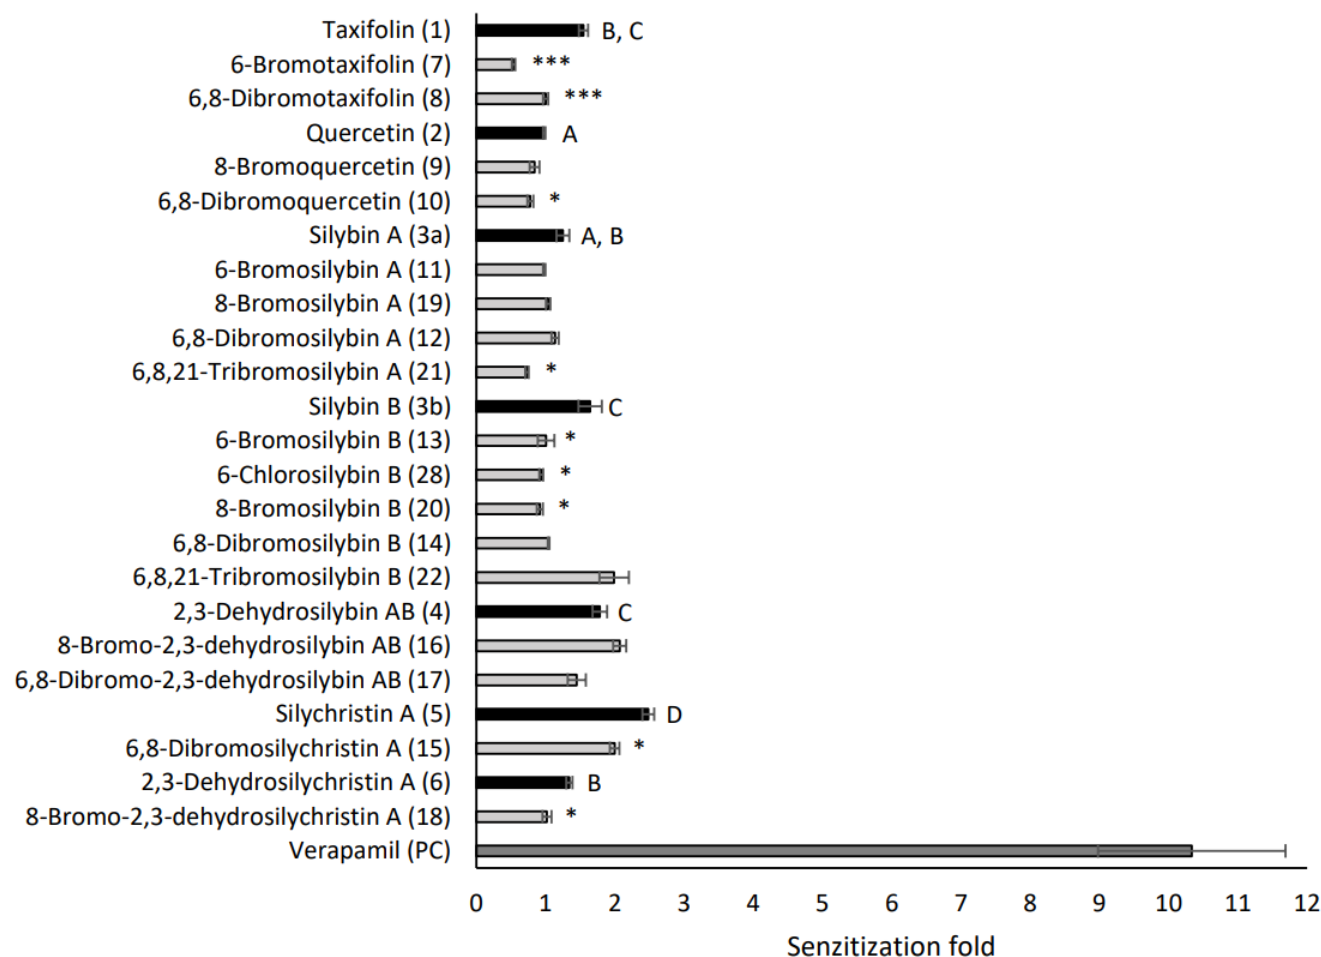

**Figure S2.** Modulation of doxorubicin-resistant phenotype in human ovarian carcinoma resistant to doxorubicin (hoc/dox) by flavonoids and their halogenated derivatives. Sensitization fold was expressed as the ratio of doxorubicin concentration halving the viability of HOC/DOX and doxorubicin concentration halving the viability of HOC/DOX in the presence of tested compound (10  $\mu$ M) using verapamil as a positive control (PC). The data are presented as the average of three repetitions with the standard error. T-test was used for the comparison of the halogenated derivative and its parent compound (\*  $p \leq 0.05$ , \*\*  $p \leq 0.01$ , \*\*\*  $p \leq 0.005$ , \*\*\*\*  $p \leq 0.001$ ). ANOVA with Duncan's post hoc test was used for the comparison of parent compounds (different capital letters indicate significant differences). PC—positive control.

## NMR Data

**Table S5.**  $^1\text{H}$  and  $^{13}\text{C}$  NMR data of 8-bromosilybin A (**19**).

| Atom # | $\delta\text{C}$ | m. | $\delta\text{H}$ | m.    | $J_{\text{HH}}$ [Hz] |
|--------|------------------|----|------------------|-------|----------------------|
| 2      | 82.84            | d  | 5.221            | d     | 11.1                 |
| 3      | 71.03            | d  | 4.650            | dd    | 11.1, 6.2            |
| 4      | 197.38           | s  | -                | -     | -                    |
| 4a     | 100.92           | s  | -                | -     | -                    |
| 5      | 161.61           | s  | -                | -     | -                    |
| 6      | 96.17            | d  | 6.144            | s     | -                    |
| 7      | 163.10           | s  | -                | -     | -                    |
| 8      | 88.10            | s  | -                | -     | -                    |
| 8a     | 158.41           | s  | -                | -     | -                    |
| 10     | 78.00            | d  | 4.186            | ddd   | 7.9, 4.5, 2.5        |
| 11     | 75.75            | d  | 4.923            | d     | 7.9                  |
| 12a    | 143.17           | s  | -                | -     | -                    |
| 13     | 116.27           | d  | 7.104            | d     | 2.0                  |
| 14     | 129.52           | s  | -                | -     | -                    |
| 15     | 121.06           | d  | 7.033            | dd    | 8.3, 2.0             |
| 16     | 116.22           | d  | 6.987            | d     | 8.3                  |
| 16a    | 143.62           | s  | -                | -     | -                    |
| 17     | 127.36           | s  | -                | -     | -                    |
| 18     | 111.70           | d  | 7.019            | d     | 2.0                  |
| 19     | 147.52           | s  | -                | -     | -                    |
| 20     | 146.93           | s  | -                | -     | -                    |
| 21     | 115.22           | d  | 6.805            | d     | 8.1                  |
| 22     | 120.43           | d  | 6.869            | dd    | 8.1, 2.0             |
| 23     | 60.08            | t  | 3.545            | ddd   | 12.2, 4.3, 2.5       |
|        |                  |    | 3.352            | ddd   | 12.2, 4.5, 6.1       |
| 3-OH   | -                | -  | 5.882            | d     | 6.2                  |
| 5-OH   | -                | -  | 11.866           | s     | -                    |
| 7-OH   | -                | -  | 11.612           | br. s | -                    |
| 19-OMe | 55.61            | q  | 3.778            | s     | -                    |
| 20-OH  | -                | -  | 9.082            | s     | -                    |
| 23-OH  | -                | -  | 4.900            | dd    | 6.1, 4.3             |

(DMSO- $d_6$ , 30 °C, 600.23 and 150.93 MHz, respectively)

**Table S6.**  $^1\text{H}$  and  $^{13}\text{C}$  NMR data of 8-bromosilybin B (20).

| Atom # | $\delta\text{C}$ | m. | $\delta\text{H}$ | m.    | $J_{\text{HH}}$ [Hz] |
|--------|------------------|----|------------------|-------|----------------------|
| 2      | 82.89            | d  | 5.226            | d     | 11.1                 |
| 3      | 71.11            | d  | 4.656            | d     | 11.1                 |
| 4      | 197.55           | s  | -                | -     | -                    |
| 4a     | 101.03           | s  | -                | -     | -                    |
| 5      | 161.65           | s  | -                | -     | -                    |
| 6      | 96.23            | d  | 6.190            | s     | -                    |
| 7      | 163.06           | s  | -                | -     | -                    |
| 8      | 88.09            | s  | -                | -     | -                    |
| 8a     | 158.46           | s  | -                | -     | -                    |
| 10     | 78.05            | d  | 4.201            | ddd   | 7.9, 4.7, 2.5        |
| 11     | 75.85            | d  | 4.913            | d     | 7.9                  |
| 12a    | 143.25           | s  | -                | -     | -                    |
| 13     | 116.41           | d  | 7.100            | d     | 2.0                  |
| 14     | 129.57           | s  | -                | -     | -                    |
| 15     | 121.10           | d  | 7.037            | dd    | 8.3, 2.0             |
| 16     | 116.31           | d  | 6.991            | d     | 8.3                  |
| 16a    | 143.69           | s  | -                | -     | -                    |
| 17     | 127.40           | s  | -                | -     | -                    |
| 18     | 111.64           | d  | 7.028            | d     | 1.9                  |
| 19     | 147.58           | s  | -                | -     | -                    |
| 20     | 146.96           | s  | -                | -     | -                    |
| 21     | 115.25           | d  | 6.810            | d     | 8.1                  |
| 22     | 120.49           | d  | 6.874            | dd    | 8.1, 1.9             |
| 23     | 60.11            | t  | 3.544            | dd    | 12.3, 2.5            |
|        |                  |    | 3.348            | dd    | 12.3, 4.7            |
| 3-OH   | -                | -  | n.a.             | -     | -                    |
| 5-OH   | -                | -  | 11.874<br>T      | br. s | -                    |
| 7-OH   | -                | -  | 11.685<br>T      | br. s | -                    |
| 19-OMe | 55.64            | q  | 3.781            | s     | -                    |
| 20-OH  | -                | -  | n.a.             | -     | -                    |
| 23-OH  | -                | -  | n.a.             | -     | -                    |

T—tentative assignment



**Table S7.**  $^1\text{H}$  and  $^{13}\text{C}$  NMR data of 6,8,21-tribromosilybin A (**21**).

| Atom # | $\delta\text{C}$ | m. | $\delta\text{H}$    | m.   | $J_{\text{HH}}$ [Hz] |
|--------|------------------|----|---------------------|------|----------------------|
| 2      | 82.94            | d  | 5.287               | d    | 11.4                 |
| 3      | 70.90            | d  | 4.746               | d    | 11.4                 |
| 4      | 198.01           | s  | -                   | -    | -                    |
| 4a     | 101.32           | s  | -                   | -    | -                    |
| 5      | 158.08           | s  | -                   | -    | -                    |
| 6      | 90.90            | s  | -                   | -    | -                    |
| 7      | 159.19           | s  | -                   | -    | -                    |
| 8      | 89.71            | s  | -                   | -    | -                    |
| 8a     | 157.25           | s  | -                   | -    | -                    |
| 10     | 77.73            | d  | 4.232               | ddd  | 7.9, 4.4, 2.5        |
| 11     | 75.19            | d  | 4.962               | d    | 7.9                  |
| 12a    | 143.03           | s  | -                   | -    | -                    |
| 13     | 116.38           | d  | 7.137               | d    | 1.9                  |
| 14     | 129.39           | s  | -                   | -    | -                    |
| 15     | 121.32           | d  | 7.048               | dd   | 8.4, 1.9             |
| 16     | 116.35           | d  | 7.005               | d    | 8.4                  |
| 16a    | 143.70           | s  | -                   | -    | -                    |
| 17     | 128.40           | s  | -                   | -    | -                    |
| 18     | 110.62           | d  | 7.086               | d    | 1.8                  |
| 19     | 148.35           | s  | -                   | -    | -                    |
| 20     | 144.07           | s  | -                   | -    | -                    |
| 21     | 108.95           | s  | -                   | -    | -                    |
| 22     | 123.67           | d  | 7.200               | d    | 1.8                  |
| 23     | 60.00            | t  | 3.573               | dd   | 12.4, 2.5            |
|        |                  |    | 3.370               | dd   | 12.4, 4.4            |
| 3-OH   | -                | -  | 6.018 <sup>T</sup>  | br.s | -                    |
| 5-OH   | -                | -  | 12.615              | s    | -                    |
| 7-OH   | -                | -  | 11.156 <sup>T</sup> | br.s | -                    |
| 19-OMe | 56.23            | q  | 3.838               | s    | -                    |
| 20-OH  | -                | -  | 9.610               | s    | -                    |
| 23-OH  | -                | -  | 4.922 <sup>T</sup>  | br.s | -                    |

(DMSO-d<sub>6</sub>, 30 °C, 700.13 and 176.05 MHz, respectively); T—tentative assignment; n.a. — not assigned (due to signal broadening)

**Table S8.**  $^1\text{H}$  and  $^{13}\text{C}$  NMR data of 6,8,21-tribromosilybin B (**22**).

| Atom # | $\delta\text{C}$ | m. | $\delta\text{H}$   | m.   | $J_{\text{HH}}$ [Hz] |
|--------|------------------|----|--------------------|------|----------------------|
| 2      | 82.94            | d  | 5.292              | d    | 11.3                 |
| 3      | 70.93            | d  | 4.745              | d    | 11.3                 |
| 4      | 198.06           | s  | -                  | -    | -                    |
| 4a     | 101.39           | s  | -                  | -    | -                    |
| 5      | 158.09           | s  | -                  | -    | -                    |
| 6      | 90.88            | s  | -                  | -    | -                    |
| 7      | 159.10           | s  | -                  | -    | -                    |
| 8      | 89.68            | s  | -                  | -    | -                    |
| 8a     | 157.25           | s  | -                  | -    | -                    |
| 10     | 77.73            | d  | 4.251              | ddd  | 7.9, 4.5, 2.5        |
| 11     | 75.22            | d  | 4.949              | d    | 7.9                  |
| 12a    | 143.06           | s  | -                  | -    | -                    |
| 13     | 116.39           | d  | 7.136              | d    | 2.0                  |
| 14     | 129.35           | s  | -                  | -    | -                    |
| 15     | 121.31           | d  | 7.050              | dd   | 8.4, 2.0             |
| 16     | 116.36           | d  | 7.004              | d    | 8.4                  |
| 16a    | 143.71           | s  | -                  | -    | -                    |
| 17     | 128.39           | s  | -                  | -    | -                    |
| 18     | 110.58           | d  | 7.094              | d    | 1.8                  |
| 19     | 148.37           | s  | -                  | -    | -                    |
| 20     | 144.06           | s  | -                  | -    | -                    |
| 21     | 108.94           | s  | -                  | -    | -                    |
| 22     | 123.67           | d  | 7.200              | d    | 1.8                  |
| 23     | 60.00            | t  | 3.573              | dd   | 12.3, 2.5            |
|        |                  |    | 3.368              | dd   | 12.3, 4.5            |
| 3-OH   | -                | -  | n.a.               | -    | -                    |
| 5-OH   | -                | -  | 12.618             | s    | -                    |
| 7-OH   | -                | -  | n.a.               | -    | -                    |
| 19-OMe | 56.24            | q  | 3.842              | s    | -                    |
| 20-OH  | -                | -  | 9.606 <sup>T</sup> | br.s | -                    |
| 23-OH  | -                | -  | n.a.               | -    | -                    |

(DMSO-d<sub>6</sub>, 30 °C, 399.87 and 100.55 MHz, respectively); T – tentative assignment; n.a. – not assigned (due signal broadening)

**Table S9.**  $^1\text{H}$  and  $^{13}\text{C}$  NMR data of 6,8,20-tribromosilychristin A (**23**).

| Atom # | $\delta\text{C}$ | m | $\delta\text{H}$ | m    | $J_{\text{H-H}}$ [Hz] |
|--------|------------------|---|------------------|------|-----------------------|
| 2      | 83.67            | d | 5.198            | d    | 11.3                  |
| 3      | 71.23            | d | 4.635            | d    | 11.3                  |
| 4      | 197.80           | s | -                | -    | -                     |
| 4a     | 101.25           | s | -                | -    | -                     |
| 5      | 158.09           | s | -                | -    | -                     |
| 6      | 90.87            | s | -                | -    | -                     |
| 7      | 159.24           | s | -                | -    | -                     |
| 8      | 89.70            | s | -                | -    | -                     |
| 8a     | 157.30           | s | -                | -    | -                     |
| 10     | 86.13            | d | 5.510            | d    | 6.8                   |
| 11     | 53.39            | d | 3.489            | ddd  | 7.2, 6.8, 5.6         |
| 11a    | 128.61           | s | -                | -    | -                     |
| 12     | 115.13           | d | 6.893            | d    | 1.7                   |
| 13     | 129.53           | s | -                | -    | -                     |
| 14     | 115.66           | d | 6.877            | d    | 1.7                   |
| 15     | 140.74           | s | -                | -    | -                     |
| 15a    | 146.96           | s | -                | -    | -                     |
| 16     | 133.47           | s | -                | -    | -                     |
| 17     | 108.92           | d | 7.022            | d    | 1.9                   |
| 18     | 148.39           | s | -                | -    | -                     |
| 19     | 143.29           | s | -                | -    | -                     |
| 20     | 108.98           | s | -                | -    | -                     |
| 21     | 121.48           | d | 7.119            | br.d | 1.9                   |
| 22     | 62.86            | t | 3.768            | dd   | 10.8, 5.6             |
|        |                  |   | 3.655            | dd   | 10.8, 7.2             |
| 3-OH   | -                | - | n.a.             | -    | -                     |
| 5-OH   | -                | - | 12.651           | s    | -                     |
| 7-OH   | -                | - | n.a.             | -    | -                     |
| 15-OH  | -                | - | n.a.             | -    | -                     |
| 18-MeO | 56.14            | q | 3.825            | s    | -                     |
| 19-OH  | -                | - | n.a.             | -    | -                     |
| 22-OH  | -                | - | n.a.             | -    | -                     |

(DMSO- $d_6$ , 30  $^{\circ}\text{C}$ , 600.23 and 150.93 MHz, respectively); n.a. — not assigned (due signal broadening)

**Table S10.**  $^1\text{H}$  and  $^{13}\text{C}$  NMR data of 8-iodosilybin A (**24**).

| Atom # | $\delta\text{C}$ | m. | $\delta\text{H}$ | m.    | $J_{\text{HH}}$ [Hz] |
|--------|------------------|----|------------------|-------|----------------------|
| 2      | 82.75            | d  | 5.206            | d     | 11.0                 |
| 3      | 71.10            | d  | 4.612            | br.d  | 11.0                 |
| 4      | 197.32           | s  | -                | -     | -                    |
| 4a     | 100.79           | s  | -                | -     | -                    |
| 5      | 162.95           | s  | -                | -     | -                    |
| 6      | 95.51            | d  | 6.139            | s     | -                    |
| 7      | 165.40           | s  | -                | -     | -                    |
| 8      | 63.83            | s  | -                | -     | -                    |
| 8a     | 161.19           | s  | -                | -     | -                    |
| 10     | 78.00            | d  | 4.214            | ddd   | 8.0, 4.6, 2.4        |
| 11     | 75.83            | d  | 4.907            | d     | 8.0                  |
| 12a    | 143.19           | s  | -                | -     | -                    |
| 13     | 116.28           | d  | 7.105            | d     | 2.0                  |
| 14     | 129.62           | s  | -                | -     | -                    |
| 15     | 120.96           | d  | 7.041            | dd    | 8.4, 2.0             |
| 16     | 116.23           | d  | 6.989            | d     | 8.4                  |
| 16a    | 143.58           | s  | -                | -     | -                    |
| 17     | 127.38           | s  | -                | -     | -                    |
| 18     | 111.65           | d  | 7.029            | d     | 1.9                  |
| 19     | 147.55           | s  | -                | -     | -                    |
| 20     | 146.93           | s  | -                | -     | -                    |
| 21     | 115.22           | d  | 6.802            | d     | 8.1                  |
| 22     | 120.49           | d  | 6.873            | dd    | 8.1, 1.9             |
| 23     | 60.09            | t  | 3.538            | dd    | 12.2, 2.4            |
|        |                  |    | 3.341            | dd    | 12.2, 4.6            |
| 3-OH   | -                | -  | 5.895            | br. s | -                    |
| 5-OH   | -                | -  | 11.931           | s     | -                    |
| 7-OH   | -                | -  | 11.651           | s     | -                    |
| 19-OMe | 55.62            | q  | 3.780            | s     | -                    |
| 20-OH  | -                | -  | 9.105            | s     | -                    |
| 23-OH  | -                | -  | 4.916            | s     | -                    |

(DMSO-*d*<sub>6</sub>, 30 °C, 700.13 and 176.05 MHz, respectively)

**Table S11.**  $^1\text{H}$  and  $^{13}\text{C}$  NMR data of 6,8-diiodosilybin A (**25**).

| Atom # | $\delta\text{C}$ | m. | $\delta\text{H}$ | m.  | $J_{\text{HH}}$ [Hz] |
|--------|------------------|----|------------------|-----|----------------------|
| 2      | 82.73            | d  | 5.262            | d   | 11.1                 |
| 3      | 70.69            | d  | 4.676            | d   | 11.1                 |
| 4      | 197.42           | s  | -                | -   | -                    |
| 4a     | 101.00           | s  | -                | -   | -                    |
| 5      | 161.93           | s  | -                | -   | -                    |
| 6      | 66.71            | s  | -                | -   | -                    |
| 7      | 163.62           | s  | -                | -   | -                    |
| 8      | 65.27            | s  | -                | -   | -                    |
| 8a     | 160.91           | s  | -                | -   | -                    |
| 10     | 77.99            | d  | 4.218            | ddd | 8.0, 4.6, 2.5        |
| 11     | 75.80            | d  | 4.913            | d   | 8.0                  |
| 12a    | 143.19           | s  | -                | -   | -                    |
| 13     | 116.23           | d  | 7.112            | d   | 2.0                  |
| 14     | 129.36           | s  | -                | -   | -                    |
| 15     | 120.92           | d  | 7.047            | dd  | 8.4, 2.0             |
| 16     | 116.23           | d  | 6.993            | d   | 8.4                  |
| 16a    | 143.62           | s  | -                | -   | -                    |
| 17     | 127.36           | s  | -                | -   | -                    |
| 18     | 111.69           | d  | 7.030            | d   | 2.0                  |
| 19     | 147.53           | s  | -                | -   | -                    |
| 20     | 146.93           | s  | -                | -   | -                    |
| 21     | 115.22           | d  | 6.806            | d   | 8.1                  |
| 22     | 120.47           | d  | 6.876            | dd  | 8.1, 2.0             |
| 23     | 60.07            | t  | 3.545            | dd  | 12.3, 2.5            |
|        |                  |    | 3.351            | dd  | 12.3, 4.6            |
| 3-OH   | -                | -  | n.a.             | -   | -                    |
| 5-OH   | -                | -  | 12.870           | s   | -                    |
| 7-OH   | -                | -  | n.a.             | -   | -                    |
| 19-OMe | 55.63            | q  | 3.783            | s   | -                    |
| 20-OH  | -                | -  | n.a.             | -   | -                    |
| 23-OH  | -                | -  | n.a.             | -   | -                    |

(DMSO-d<sub>6</sub>, 30 °C, 600.23 and 150.93 MHz, respectively); n.a. — not assigned (due signal broadening)

**Table S12.**  $^1\text{H}$  and  $^{13}\text{C}$  NMR data of 6,8-diiodosilybin B (**26**).

| Atom # | $\delta\text{C}$ | m. | $\delta\text{H}$    | m.   | $J_{\text{HH}}$ [Hz] |
|--------|------------------|----|---------------------|------|----------------------|
| 2      | 82.72            | d  | 5.249               | d    | 11.2                 |
| 3      | 70.68            | d  | 4.667               | d    | 11.2                 |
| 4      | 197.23           | s  | -                   | -    | -                    |
| 4a     | 100.85           | s  | -                   | -    | -                    |
| 5      | 161.97           | s  | -                   | -    | -                    |
| 6      | 66.89            | s  | -                   | -    | -                    |
| 7      | 163.88           | s  | -                   | -    | -                    |
| 8      | 65.49            | s  | -                   | -    | -                    |
| 8a     | 160.91           | s  | -                   | -    | -                    |
| 10     | 77.99            | d  | 4.217               | ddd  | 8.0, 4.6, 2.4        |
| 11     | 75.83            | d  | 4.908               | d    | 8.0                  |
| 12a    | 143.21           | s  | -                   | -    | -                    |
| 13     | 116.26           | d  | 7.109               | d    | 2.0                  |
| 14     | 129.44           | s  | -                   | -    | -                    |
| 15     | 120.96           | d  | 7.042               | dd   | 8.4, 2.0             |
| 16     | 116.24           | d  | 6.991               | d    | 8.4                  |
| 16a    | 143.63           | s  | -                   | -    | -                    |
| 17     | 127.36           | s  | -                   | -    | -                    |
| 18     | 111.65           | d  | 7.028               | d    | 1.9                  |
| 19     | 147.54           | s  | -                   | -    | -                    |
| 20     | 146.93           | s  | -                   | -    | -                    |
| 21     | 115.22           | d  | 6.802               | d    | 8.1                  |
| 22     | 120.49           | d  | 6.872               | dd   | 8.1, 1.9             |
| 23     | 60.08            | t  | 3.538               | dd   | 12.3, 2.4            |
|        |                  |    | 3.341               | dd   | 12.3, 4.6            |
| 3-OH   | -                | -  | 5.985 <sup>T</sup>  | br.s | -                    |
| 5-OH   | -                | -  | 12.893              | s    | -                    |
| 7-OH   | -                | -  | 10.531 <sup>T</sup> | br.s | -                    |
| 19-OMe | 55.62            | q  | 3.779               | s    | -                    |
| 20-OH  | -                | -  | 9.104 <sup>T</sup>  | br.s | -                    |
| 23-OH  | -                | -  | 4.885 <sup>T</sup>  | br.s | -                    |

(DMSO-d<sub>6</sub>, 30 °C, 600.23 and 150.93 MHz, respectively; T—tentative assignment; n.a.—not assigned (due signal broadening))

**Table S13.**  $^1\text{H}$  and  $^{13}\text{C}$  NMR data of 6,8-diiodosilychristin A (27).

| Atom # | $\delta\text{C}$ | m. | $\delta\text{H}$ | m.     | $J_{\text{HH}}$ [Hz] |
|--------|------------------|----|------------------|--------|----------------------|
| 2      | 83.54            | d  | 5.171            | d      | 11.1                 |
| 3      | 71.04            | d  | 4.572            | d      | 11.1                 |
| 4      | 197.28           | s  | -                | -      | -                    |
| 4a     | 100.92           | s  | -                | -      | -                    |
| 5      | 161.95           | s  | -                | -      | -                    |
| 6      | 66.72            | s  | -                | -      | -                    |
| 7      | 163.70           | s  | -                | -      | -                    |
| 8      | 65.29            | s  | -                | -      | -                    |
| 8a     | 161.01           | s  | -                | -      | -                    |
| 10     | 86.97            | d  | 5.465            | d      | 7.1                  |
| 11     | 53.26            | d  | 3.480            | br.ddd | 7.1, 6.9, 5.5        |
| 11a    | 128.94           | s  | -                | -      | -                    |
| 12     | 114.96           | d  | 6.902            | dd     | 1.7, 0.8             |
| 13     | 129.41           | s  | -                | -      | -                    |
| 14     | 115.37           | d  | 6.863            | d      | 1.7                  |
| 15     | 140.66           | s  | -                | -      | -                    |
| 15a    | 147.03           | s  | -                | -      | -                    |
| 16     | 132.24           | s  | -                | -      | -                    |
| 17     | 110.36           | d  | 6.980            | d      | 2.0                  |
| 18     | 147.45           | s  | -                | -      | -                    |
| 19     | 146.27           | s  | -                | -      | -                    |
| 20     | 115.18           | d  | 6.766            | d      | 8.1                  |
| 21     | 118.63           | d  | 6.825            | dd     | 8.1, 2.0             |
| 22     | 62.84            | t  | 3.734            | dd     | 10.8, 5.5            |
|        |                  |    | 3.654            | dd     | 10.8, 6.9            |
| 3-OH   | -                | -  | n.a.             | -      | -                    |
| 5-OH   | -                | -  | 12.907           | s      | -                    |
| 7-OH   | -                | -  | n.a.             | -      | -                    |
| 15-OH  | -                | -  | n.a.             | -      | -                    |
| 19-OMe | 55.59            | q  | 3.762            | s      | -                    |
| 20-OH  | -                | -  | n.a.             | -      | -                    |
| 23-OH  | -                | -  | n.a.             | -      | -                    |

n.a.—not assigned (due to signal broadening)

**Table S14.**  $^1\text{H}$  and  $^{13}\text{C}$  NMR data of 6-chlorosilybin B (**28a**) and 8-chlorosilybin B (**28b**)—(isolated as a mixture containing 6-chloro silybin as a major compound and 8-chloro silybin as a minor compound).

| Atom # | $\delta\text{C}$ | m. | $\delta\text{H}$   | m.    | $J_{\text{HH}}$ [Hz] |
|--------|------------------|----|--------------------|-------|----------------------|
| 2      | 82.60            | d  | 5.130              | d     | 11.3                 |
| 3      | 71.20            | d  | 4.666              | dd    | 11.3, 6.4            |
| 4      | 198.10           | s  | -                  | -     | -                    |
| 4a     | 100.60           | s  | -                  | -     | -                    |
| 5      | 158.21           | s  | -                  | -     | -                    |
| 6      | 99.63            | s  | -                  | -     | -                    |
| 7      | 161.91           | s  | -                  | -     | -                    |
| 8      | 95.10            | d  | 6.101              | s     | -                    |
| 8a     | 160.09           | s  | -                  | -     | -                    |
| 10     | 78.01            | d  | 4.172              | ddd   | 7.9, 4.7, 2.7        |
| 11     | 75.72            | d  | 4.910              | d     | 7.9                  |
| 12a    | 143.16           | s  | -                  | -     | -                    |
| 13     | 116.37           | d  | 7.089              | d     | 2.0                  |
| 14     | 129.64           | s  | -                  | -     | -                    |
| 15     | 121.22           | d  | 7.008              | dd    | 8.3, 2.0             |
| 16     | 116.18           | d  | 6.972              | d     | 8.3                  |
| 16a    | 143.61           | s  | -                  | -     | -                    |
| 17     | 127.35           | s  | -                  | -     | -                    |
| 18     | 111.68           | d  | 7.011              | d     | 2.0                  |
| 19     | 147.52           | s  | -                  | -     | -                    |
| 20     | 146.93           | s  | -                  | -     | -                    |
| 21     | 115.23           | d  | 6.806              | d     | 8.1                  |
| 22     | 120.40           | d  | 6.865              | dd    | 8.1, 2.0             |
| 23     | 60.07            | t  | 3.548              | m     | -                    |
|        |                  |    | 3.357              | m     | -                    |
| 3-OH   | -                | -  | 5.876 <sup>j</sup> | d     | 6.4                  |
| 5-OH   | -                | -  | 12.452             | s     | -                    |
| 7-OH   | -                | -  | 11.593             | br. s | -                    |
| 19-OMe | 55.62            | q  | 3.779              | s     | -                    |
| 20-OH  | -                | -  | 9.083              | s     | -                    |
| 23-OH  | -                | -  | 4.902              | br. m | -                    |



| Atom # | $\delta\text{C}$ | m. | $\delta\text{H}$   | m.    | $J_{\text{HH}}$ [Hz] |
|--------|------------------|----|--------------------|-------|----------------------|
| 2      | 82.91            | d  | 5.224              | d     | 11.1                 |
| 3      | 71.03            | d  | 4.673              | dd    | 11.1, 6.3            |
| 4      | 197.56           | s  | -                  | -     | -                    |
| 4a     | 100.85           | s  | -                  | -     | -                    |
| 5      | 160.73           | s  | -                  | -     | -                    |
| 6      | 96.21            | d  | 6.145              | s     | -                    |
| 7      | 162.04           | s  | -                  | -     | -                    |
| 8      | 98.56            | s  | -                  | -     | -                    |
| 8a     | 157.27           | s  | -                  | -     | -                    |
| 10     | 78.01            | d  | 4.184              | ddd   | 7.9, 4.6, 2.5        |
| 11     | 75.75            | d  | 4.923              | d     | 7.9                  |
| 12a    | 143.19           | s  | -                  | -     | -                    |
| 13     | 116.37           | d  | 7.107              | d     | 2.0                  |
| 14     | 129.46           | s  | -                  | -     | -                    |
| 15     | 121.15           | d  | 7.035              | dd    | 8.3, 2.0             |
| 16     | 116.24           | d  | 6.990              | d     | 8.3                  |
| 16a    | 143.67           | s  | -                  | -     | -                    |
| 17     | 127.35           | s  | -                  | -     | -                    |
| 18     | 111.70           | d  | 7.018              | d     | 2.1                  |
| 19     | 147.52           | s  | -                  | -     | -                    |
| 20     | 146.93           | s  | -                  | -     | -                    |
| 21     | 115.23           | d  | 6.806              | d     | 8.1                  |
| 22     | 120.43           | d  | 6.870              | dd    | 8.1, 2.1             |
| 23     | 60.07            | t  | 3.548              | m     | -                    |
|        |                  |    | 3.357              | m     | -                    |
| 3-OH   | -                | -  | 5.887 <sup>†</sup> | d     | 6.3                  |
| 5-OH   | -                | -  | 11.811             | s     | -                    |
| 7-OH   | -                | -  | 11.593             | br. s | -                    |
| 19-OMe | 55.62            | q  | 3.779              | s     | -                    |
| 20-OH  | -                | -  | 9.083              | s     | -                    |
| 23-OH  | -                | -  | 4.902              | br. m | -                    |

<sup>†</sup>—J-resolved readout

## NMR Spectra

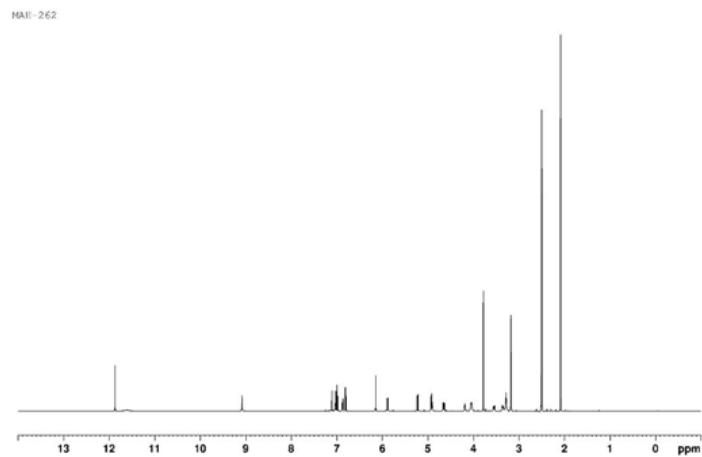

**Figure S3.** <sup>1</sup>H NMR spectrum of 8-bromosilybin A (19). (600.23 MHz, DMSO-d<sub>6</sub>, 30 °C).

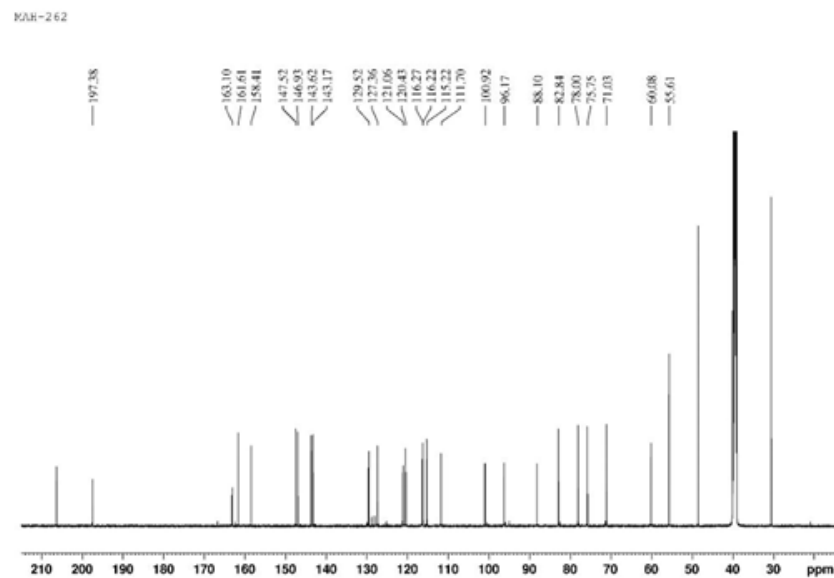

**Figure S4.**  $^{13}\text{C}$  NMR spectrum of 8-bromosilybin A (**19**). (150.93 MHz,  $\text{DMSO-}d_6$ , 30 °C).

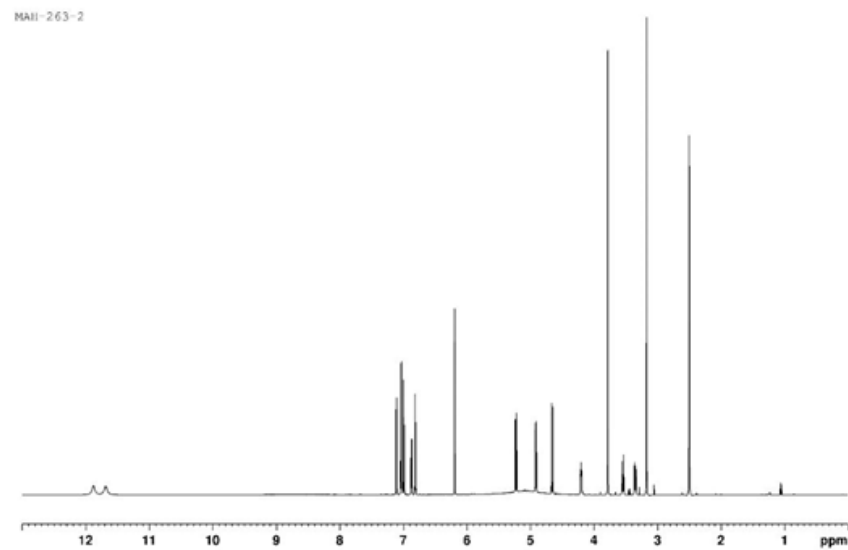

**Figure S5.**  $^1\text{H}$  NMR spectrum of 8-bromosilybin B (**20**). (600.23 MHz, DMSO- $d_6$ , 30 °C).

MAH-263-2

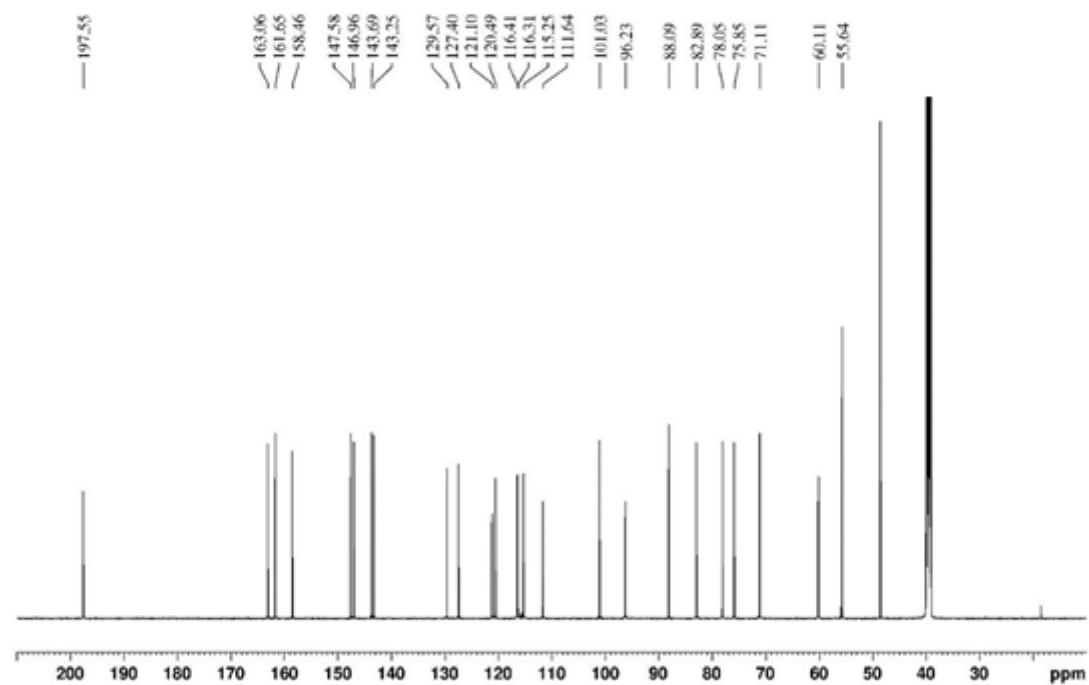

**Figure S6.**  $^{13}\text{C}$  NMR spectrum of 8-bromosilybin B (20). (150.93 MHz, DMSO- $d_6$ , 30 °C).

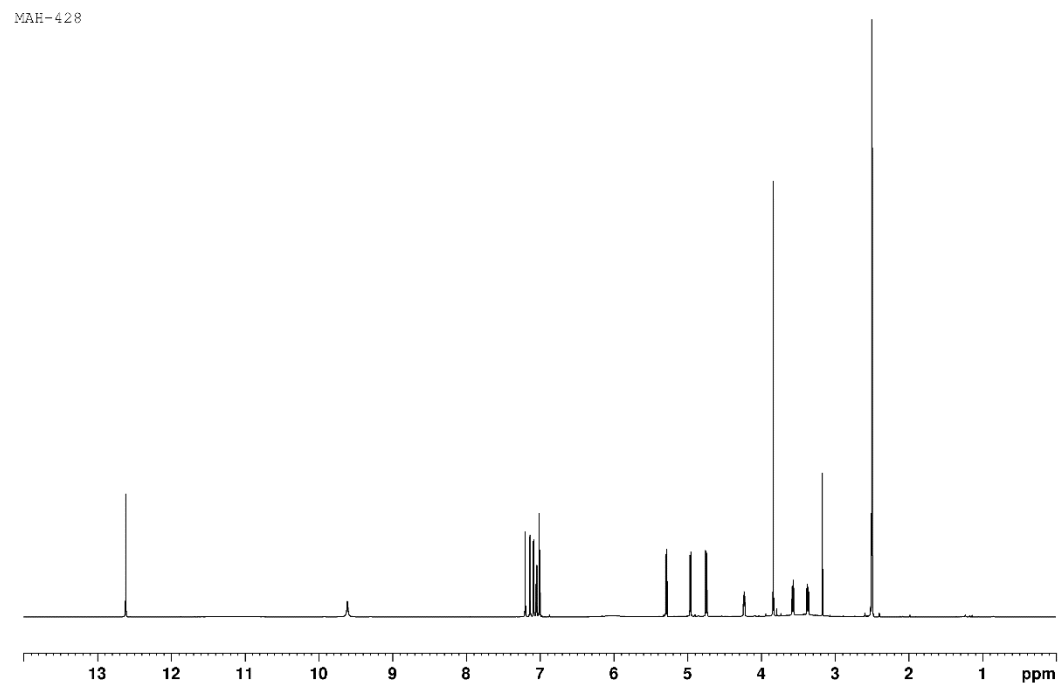

**Figure S7.**  $^1\text{H}$  NMR spectrum of 6,8,21-tribromosilybin A (**21**). (700.13 MHz,  $\text{DMSO}-d_6$ , 30  $^\circ\text{C}$ ).

MAH-428

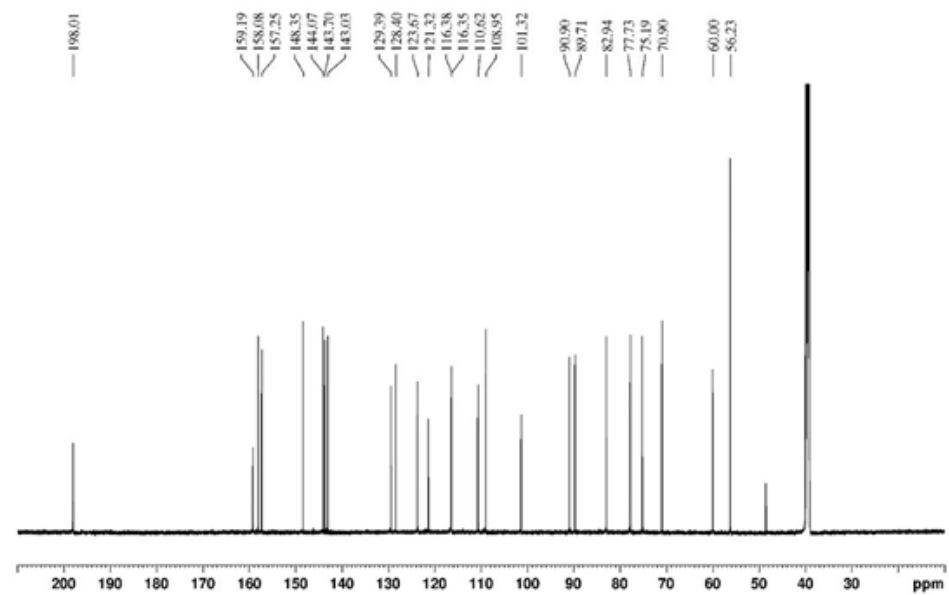

**Figure S8.**  $^{13}\text{C}$  NMR spectrum of 6,8,21-tribromosilybin A (21). (176.05 MHz,  $\text{DMSO}-d_6$ , 30 °C).

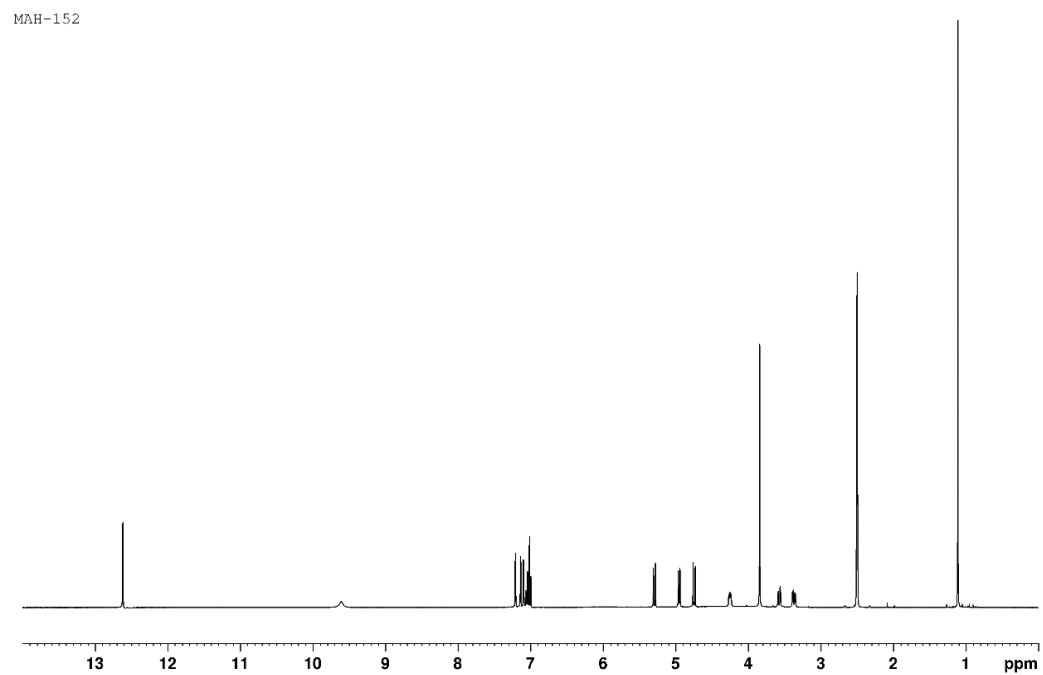

**Figure S9.**  $^1\text{H}$  NMR spectrum of 6,8,21-tribromosilybin B (**22**). (399.87 MHz,  $\text{DMSO}-d_6$ , 30  $^\circ\text{C}$ ).



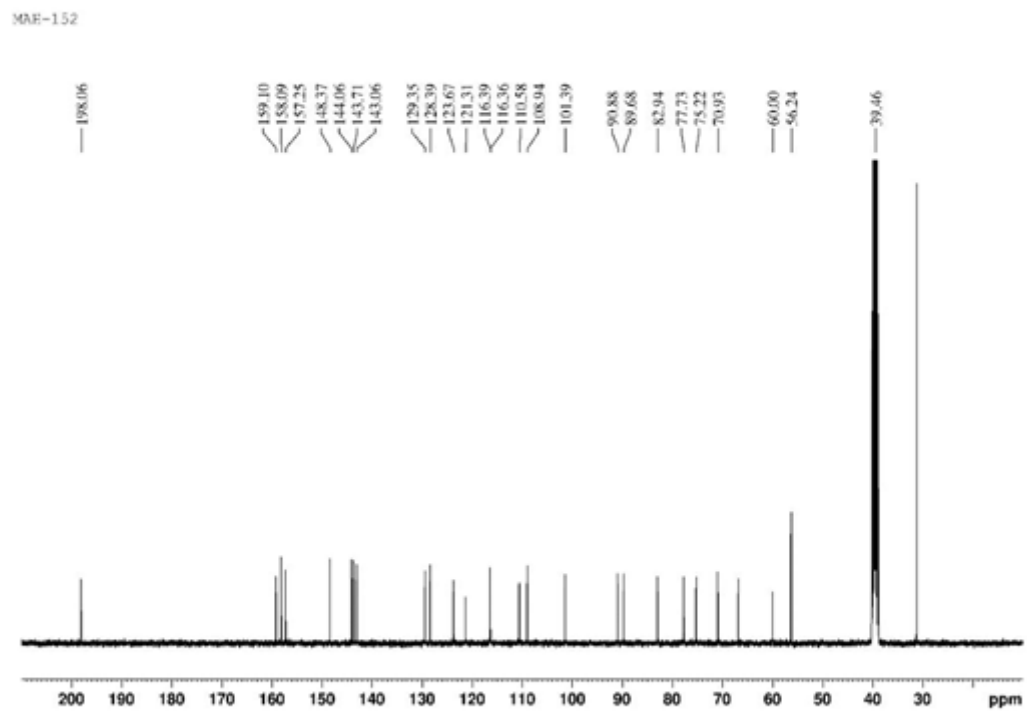

**Figure S10.**  $^{13}\text{C}$  NMR spectrum of 6,8,21-tribromosilybin B (**22**). (100.55 MHz,  $\text{DMSO-}d_6$ , 30 °C).

MAH-134-C-f4

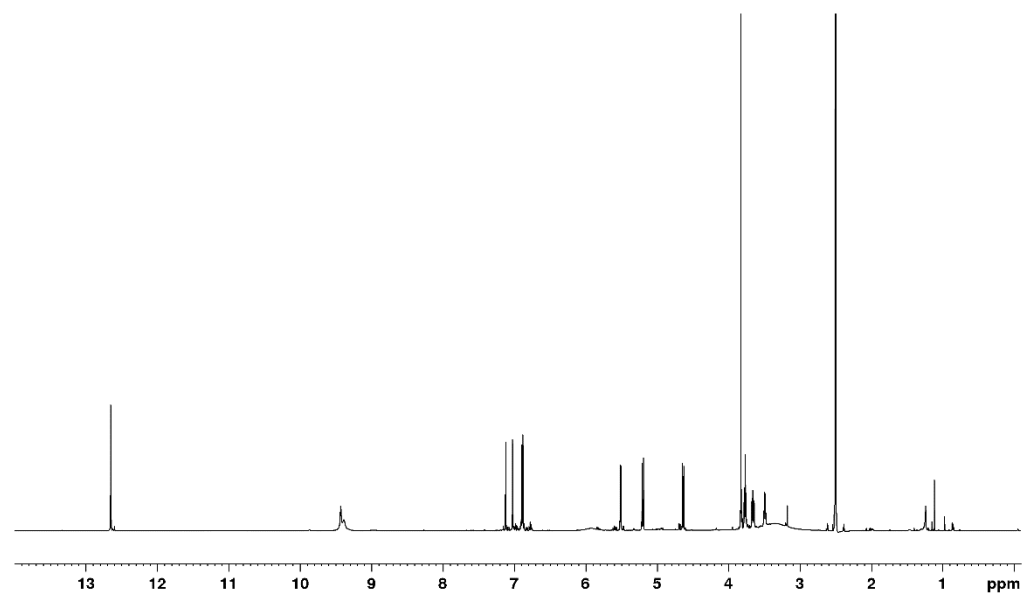

**Figure S11.**  $^1\text{H}$  NMR spectrum of 6,8,20-tribromosilychristin A (**23**). (600.23 MHz,  $\text{DMSO-}d_6$ , 30 °C).

MAH-134-C-f4

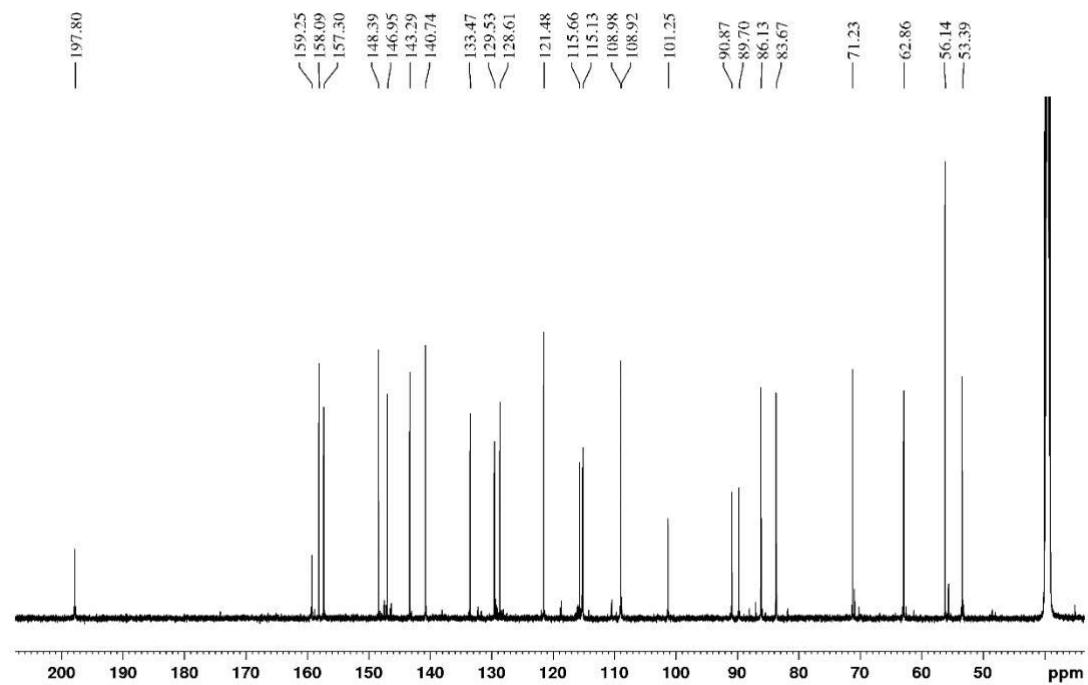

**Figure S12.**  $^{13}\text{C}$  NMR spectrum of 6,8,20-tribromosilychristin A (23). (150.93 MHz,  $\text{DMSO}-d_6$ , 30 °C).

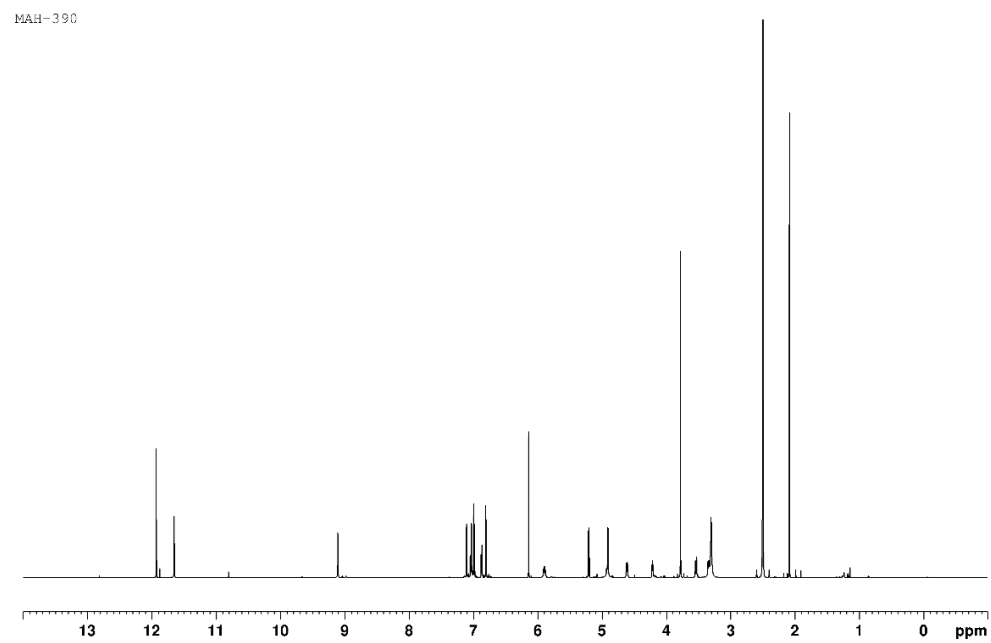

**Figure S13.**  $^1\text{H}$  NMR spectrum of 8-iodosilybin A (**24**). (700.13 MHz,  $\text{DMSO}-d_6$ , 30 °C).

MAH-390

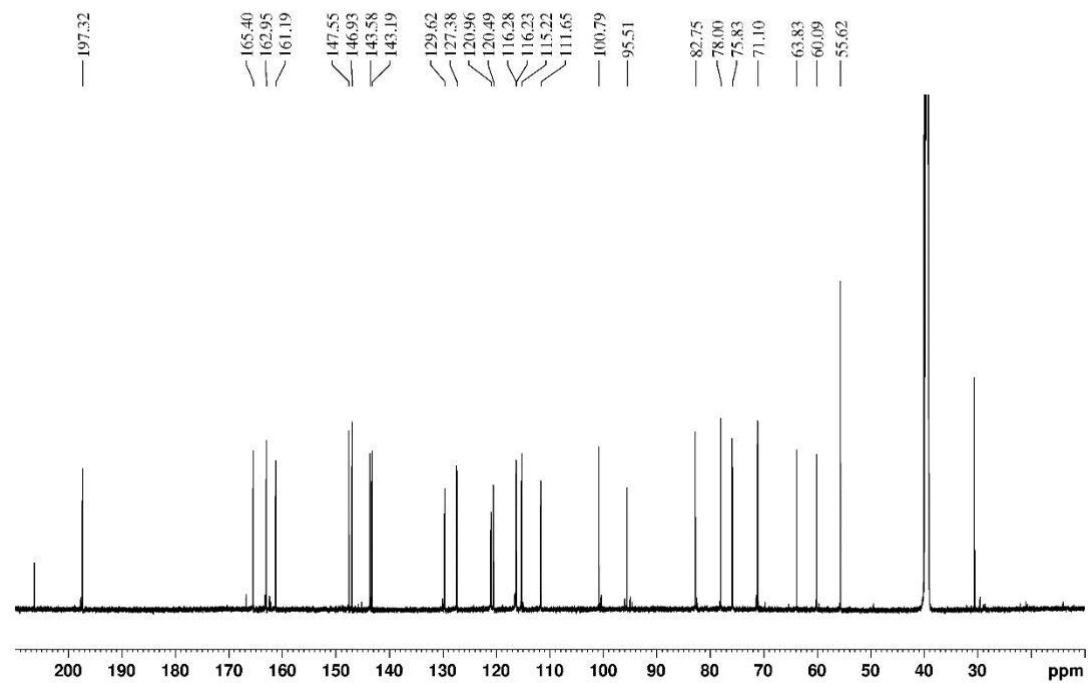

**Figure S14.**  $^{13}\text{C}$  NMR spectrum of 8-iodosilybin A (**24**). (176.05 MHz,  $\text{DMSO-}d_6$ , 30 °C).

MAH-167-B

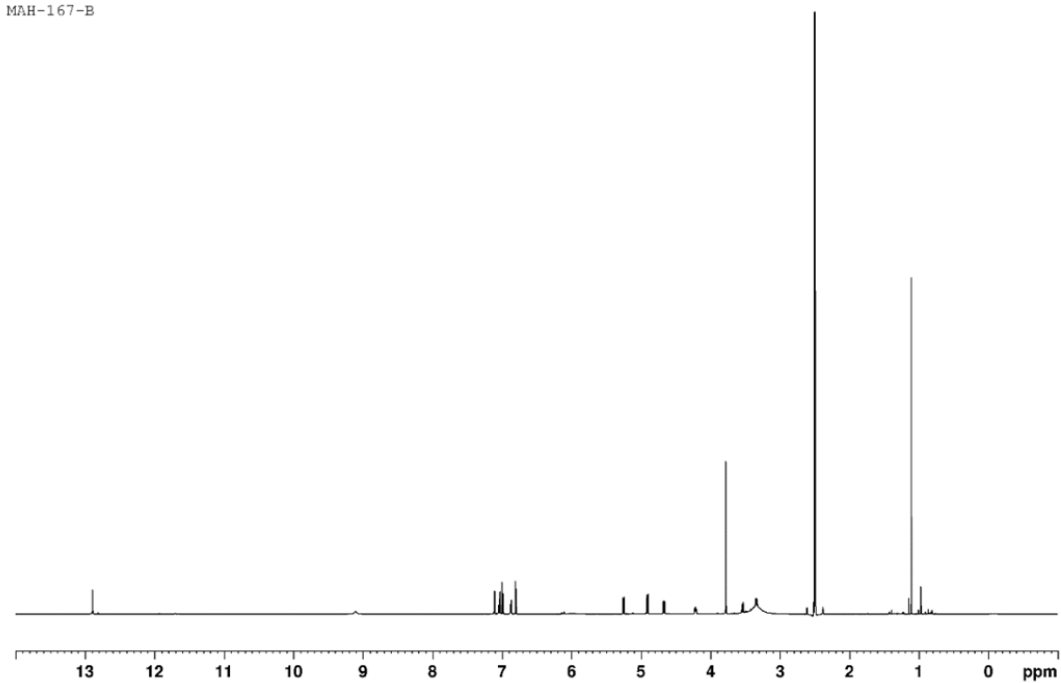

**Figure S15.**  $^1\text{H}$  NMR spectrum of 6,8-diiodosilybin A (**25**). (600.23 MHz,  $\text{DMSO-}d_6$ , 30 °C).

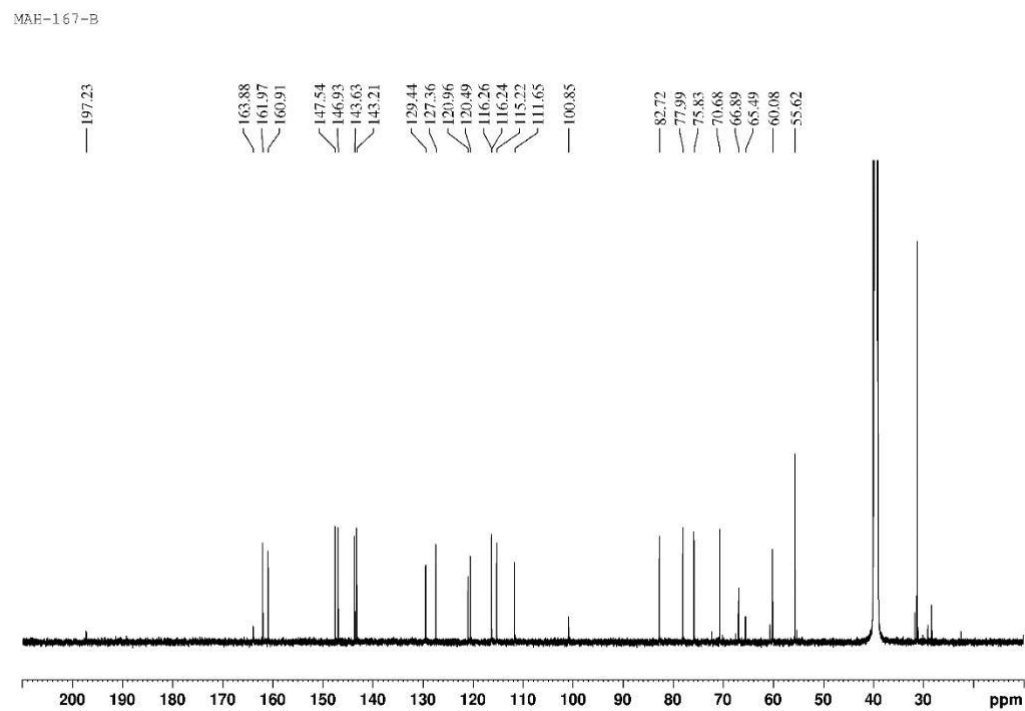

**Figure S16.**  $^{13}\text{C}$  NMR spectrum of 6,8-diiodosilybin A (**25**). (150.93 MHz,  $\text{DMSO-}d_6$ , 30 °C).

MAH-166

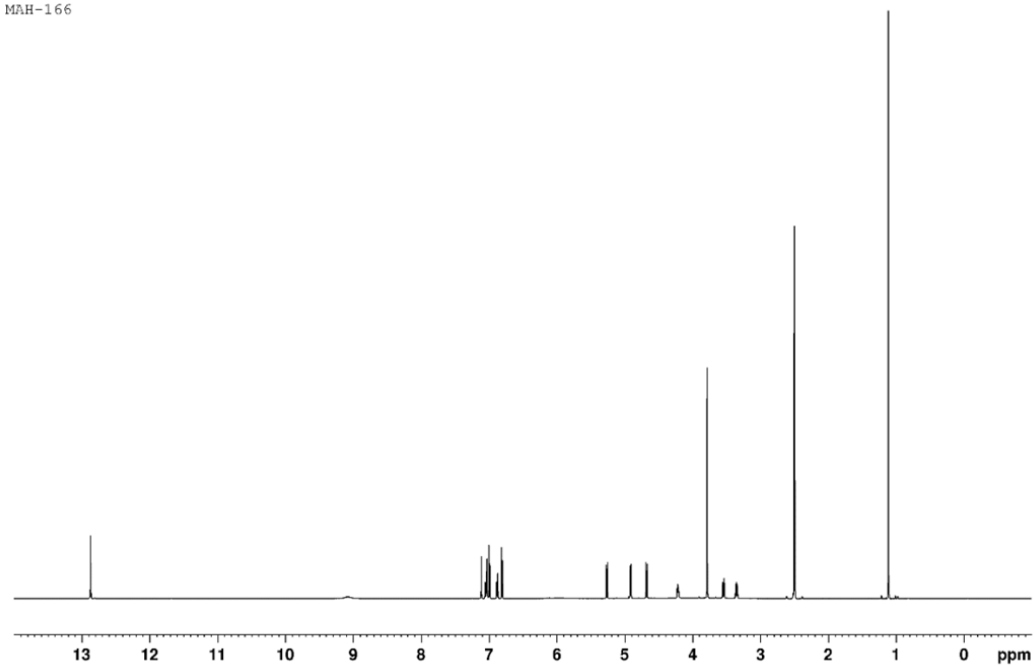

**Figure S17.** <sup>1</sup>H NMR spectrum of 6,8-diiodosilybin B (**26**). (600.23 MHz, DMSO-d<sub>6</sub>, 30 °C).



MAH-166

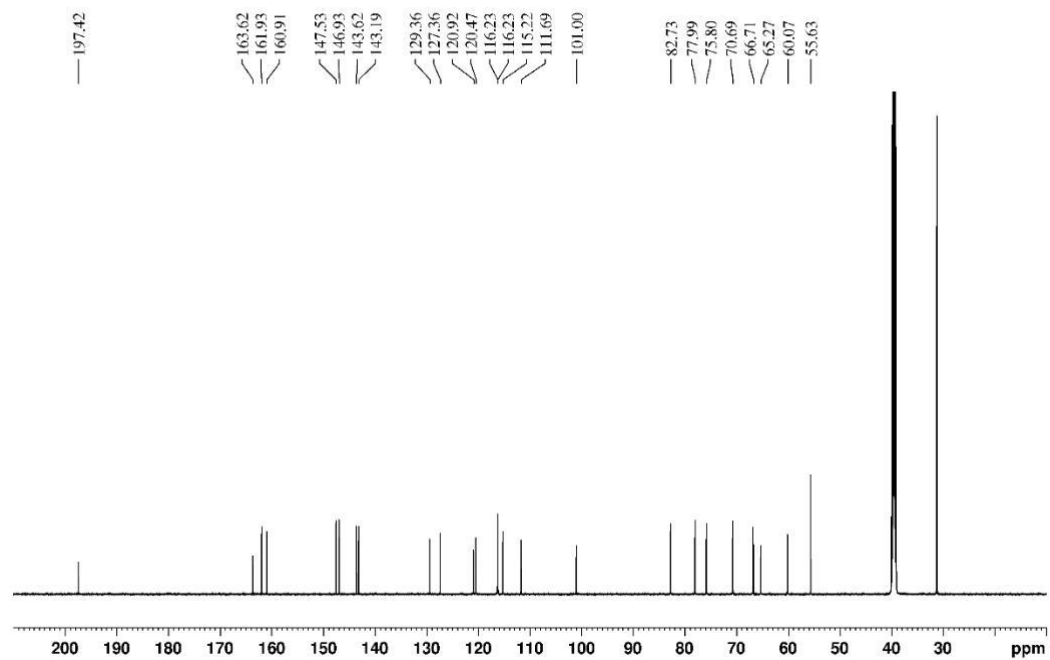

**Figure S18.**  $^{13}\text{C}$  NMR spectrum of 6,8-diiodosilybin B (**26**). (150.93 MHz,  $\text{DMSO-}d_6$ , 30 °C).

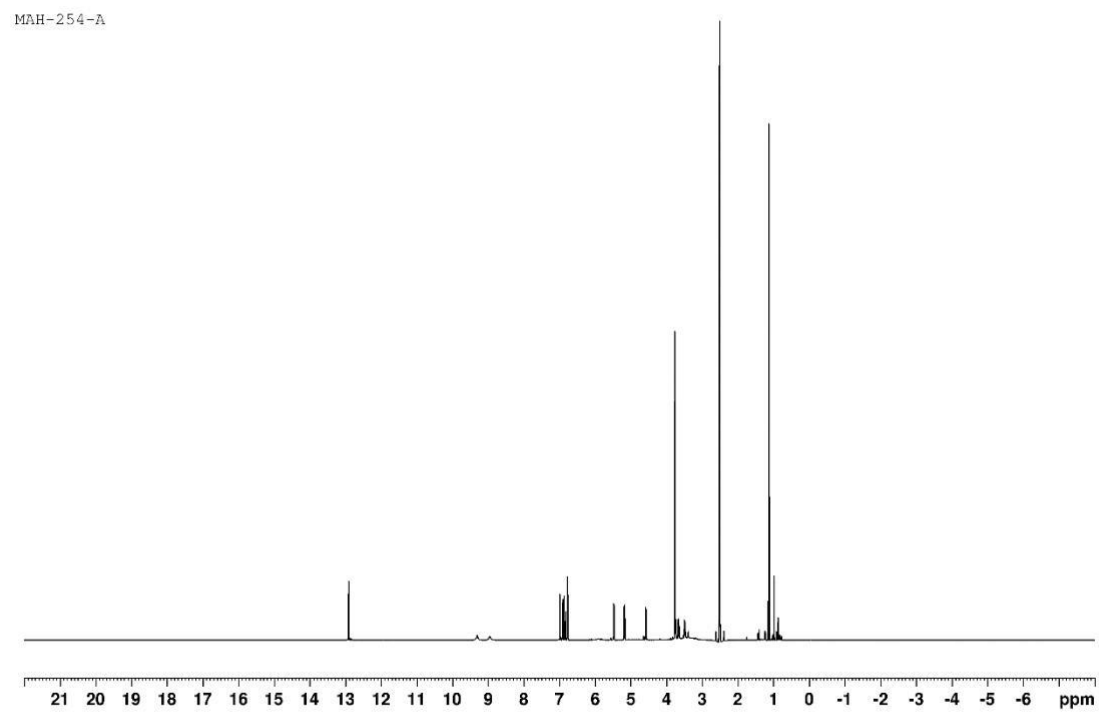

**Figure S19.**  $^1\text{H}$  NMR spectrum of 6,8-diiodosilychristin A (**27**). (600.23 MHz,  $\text{DMSO}-d_6$ , 30  $^\circ\text{C}$ ).

KAH-254-A

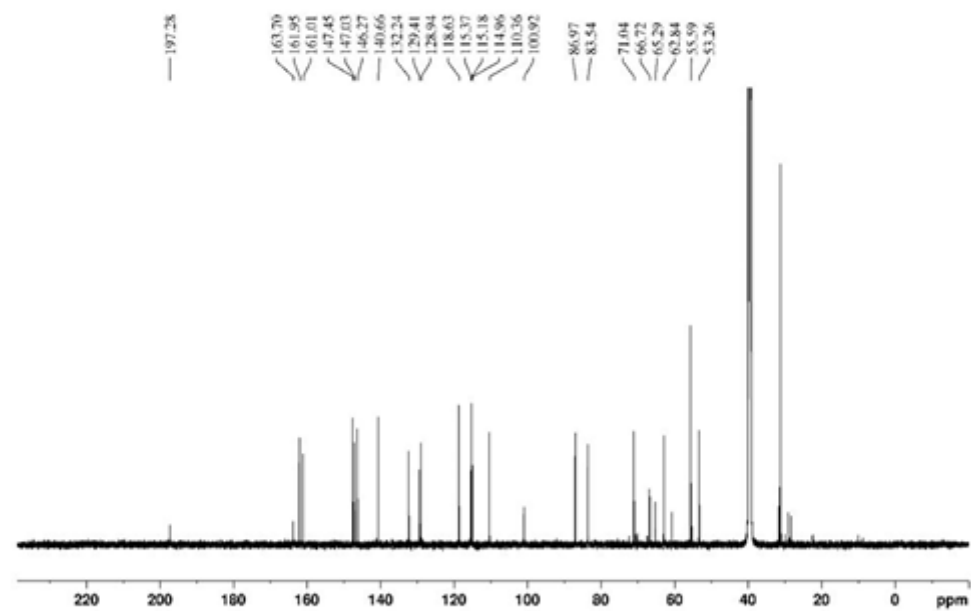

**Figure S20.** <sup>13</sup>C NMR spectrum of 6,8-diiodosilychristin A (27). (150.93 MHz, DMSO-*d*<sub>6</sub>, 30 °C).

MAH-143-A-f1

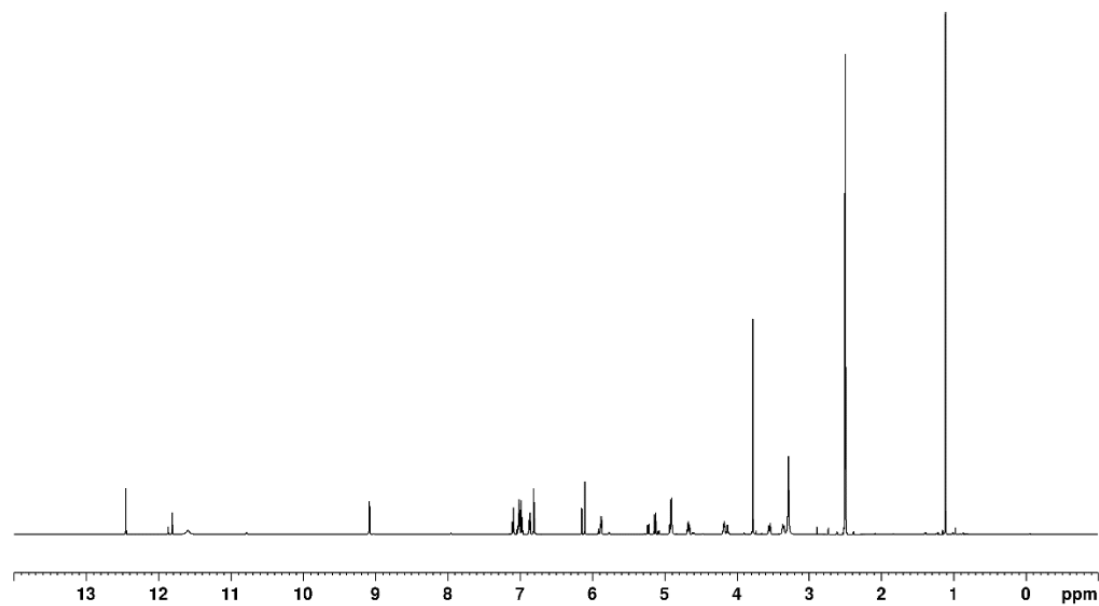

**Figure S21.**  $^1\text{H}$  NMR spectrum of 6-chlorosilybin B (**28a**) and 8-chlorosilybin B (**28b**). (600.23 MHz,  $\text{DMSO}-d_6$ , 30  $^\circ\text{C}$ ).

MAH-143-A-f1

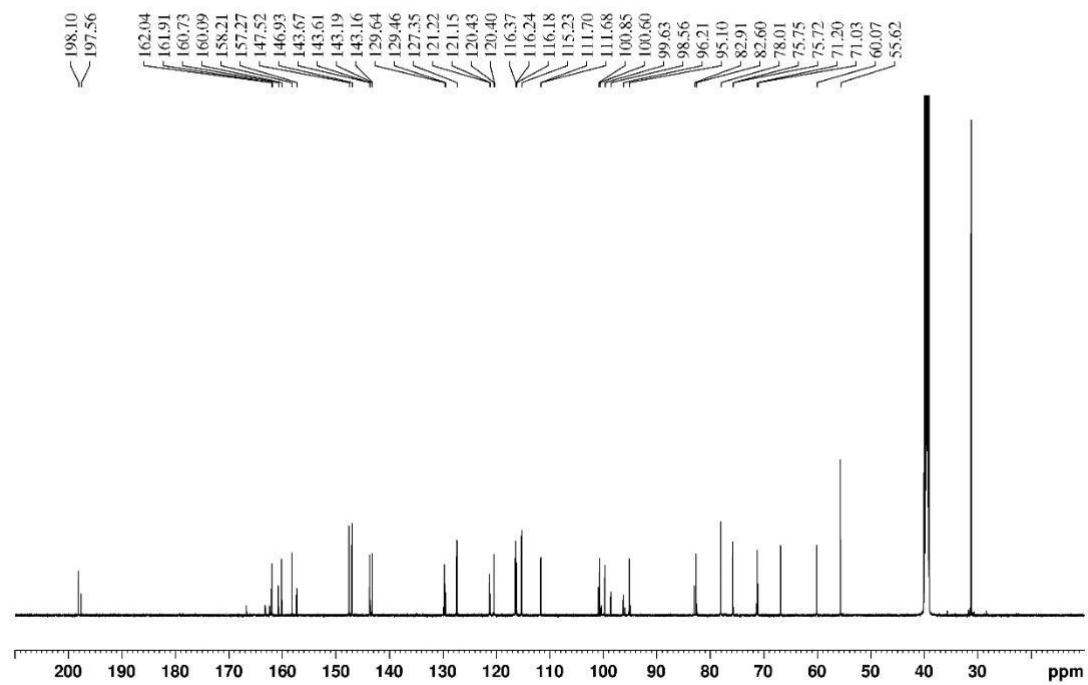

**Figure S22.**  $^{13}\text{C}$  NMR spectrum of 6-chlorosilybin B (28a) and 8-chlorosilybin B (28b). (150.93 MHz,  $\text{DMSO-}d_6$ , 30 °C).

## HPLC/MS Analysis

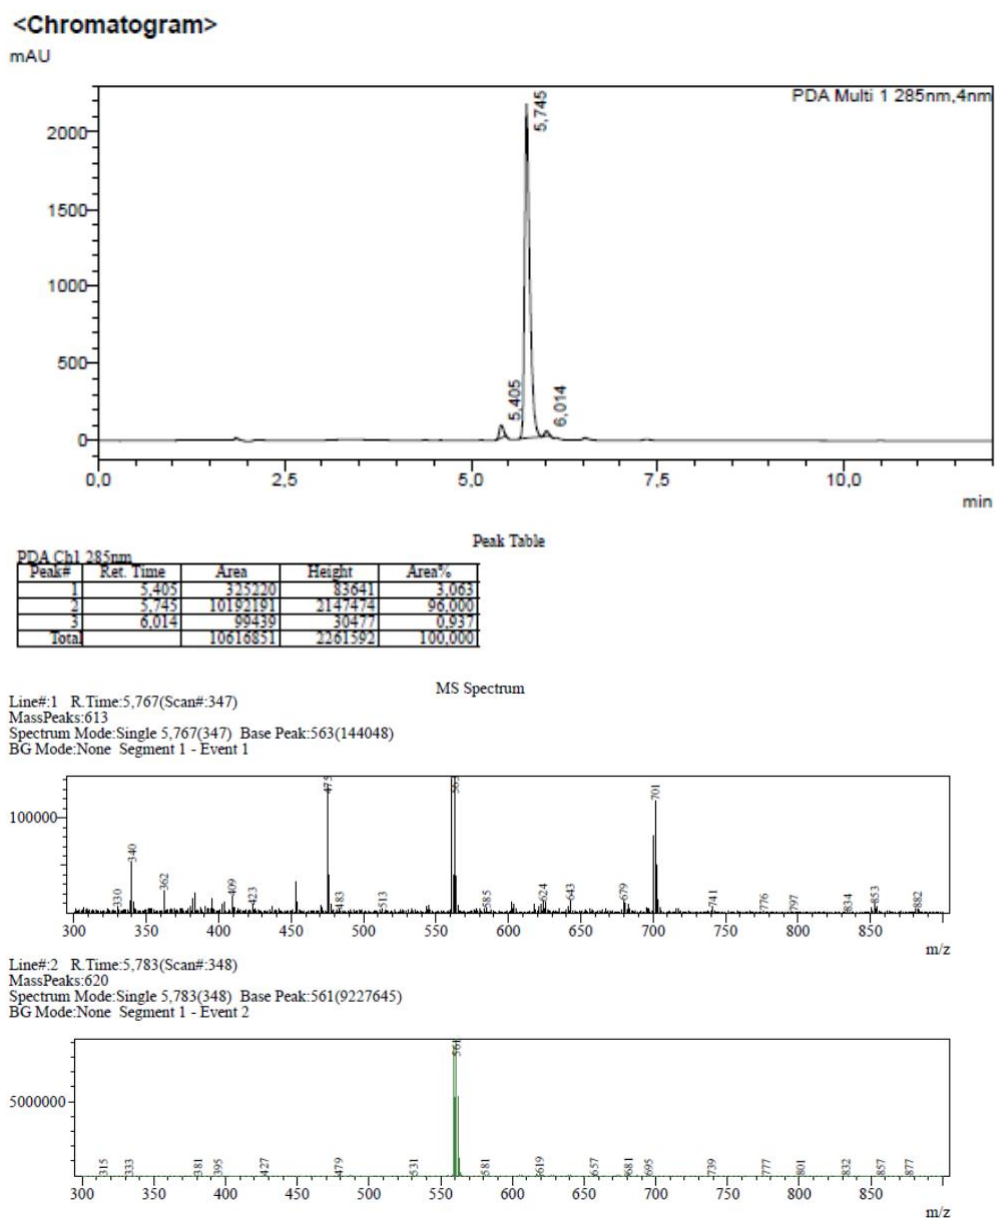

**Figure S23.** HPLC chromatogram and LC/MS spectra of **8-bromosilybin A (19)**. Detected at 285 nm. Chromolith C18, 0.4 mL/min, 25 °C. Product peak 5.745 min, purity 96%.

# <Chromatogram>

mAU

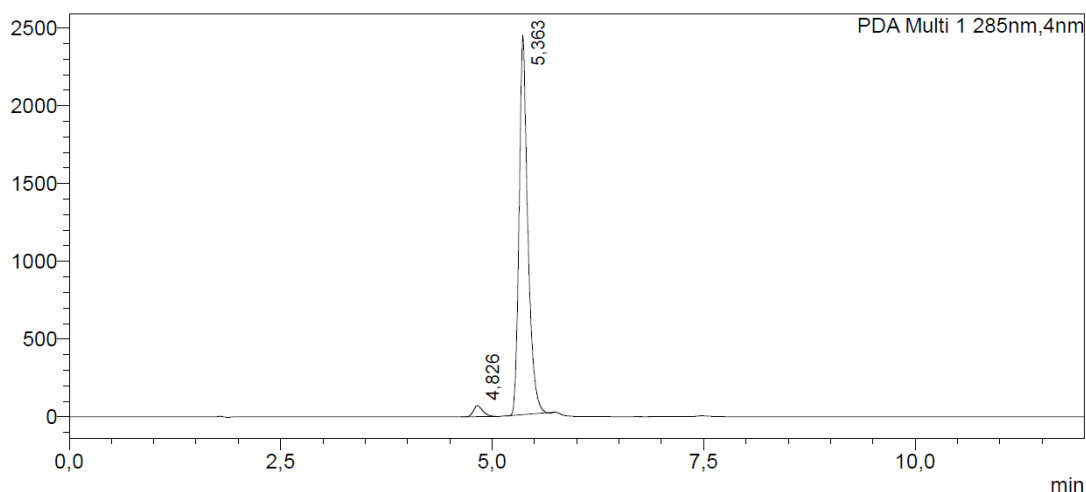

Peak Table

PDA Ch1 285nm

| Peak# | Ret. Time | Area     | Height  | Area%   |
|-------|-----------|----------|---------|---------|
| 1     | 4.826     | 533260   | 69923   | 2.969   |
| 2     | 5.363     | 17425940 | 2435586 | 97.031  |
| Total |           | 17959200 | 2505509 | 100.000 |

MS Spectrum

Line#:1 R.Time:----(Scan#:----)

MassPeaks:224

Spectrum Mode:Averaged 5.167-5.633(311-339) Base Peak:563(125131)

BG Mode:Averaged 1.267-2.233(77-135) Segment 1 - Event 1

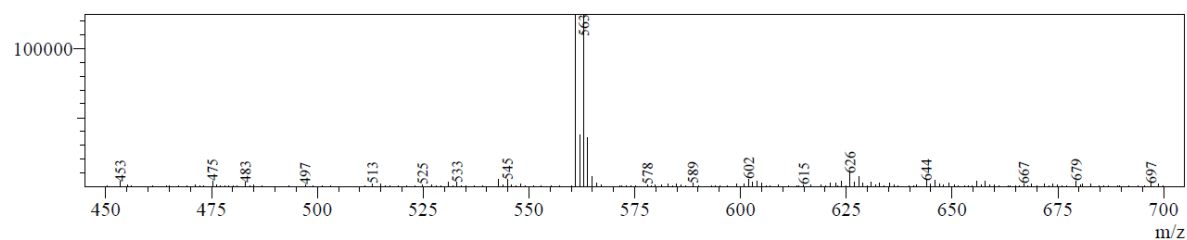

Line#:2 R.Time:----(Scan#:----)

MassPeaks:151

Spectrum Mode:Averaged 5.183-5.650(312-340) Base Peak:561(2301570)

BG Mode:Averaged 1.283-2.250(78-136) Segment 1 - Event 2

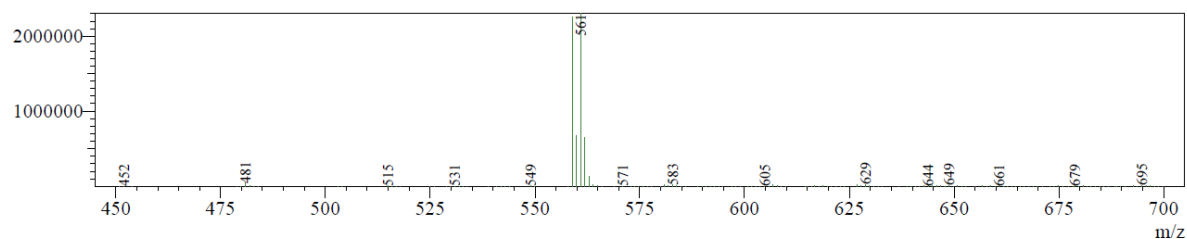

**Figure S24.** HPLC chromatogram and LC/MS spectra of **8-bromosilybin B (20)**. Detected at 285 nm. Chromolith C18, 0.4 mL/min, 25 °C. Product peak 5.363 min, purity 97%.

# <Chromatogram>

mAU

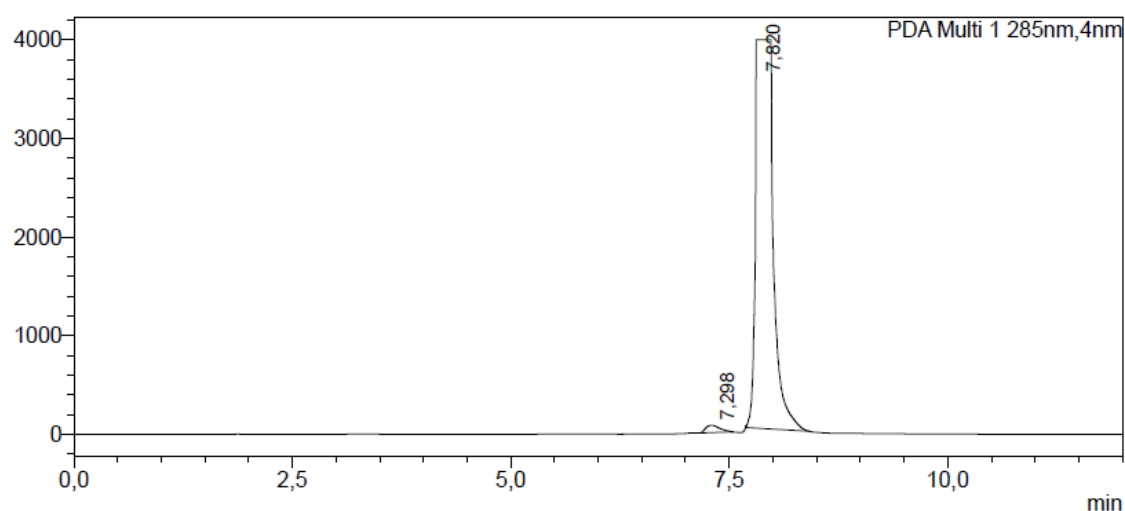

Peak Table

PDA Ch1 285nm

| Peak# | Ret. Time | Area     | Height  | Area%   |
|-------|-----------|----------|---------|---------|
| 1     | 7.298     | 828623   | 72019   | 1.461   |
| 2     | 7.820     | 55895316 | 3937295 | 98.539  |
| Total |           | 56723940 | 4009314 | 100.000 |

MS Spectrum

Line#:1 R.Time:7.950(Scan#:478)

MassPeaks:666

Spectrum Mode:Single 7.950(478) Base Peak:719(6343176)

BG Mode:None Segment 1 - Event 2

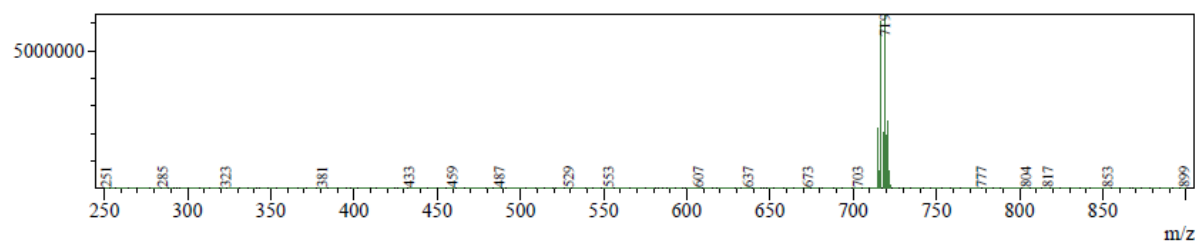

Line#:2 R.Time:7.933(Scan#:477)

MassPeaks:662

Spectrum Mode:Single 7.933(477) Base Peak:475(865515)

BG Mode:None Segment 1 - Event 1

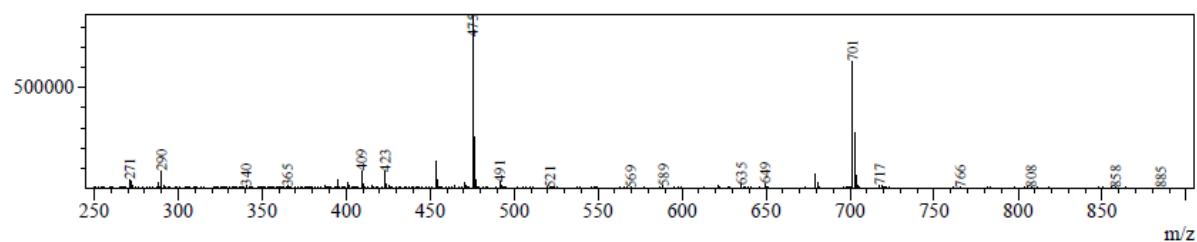

**Figure S25.** HPLC chromatogram and LC/MS spectra of **6,8,21-tribromosilybin A (21)** Detected at 285 nm. Chromolith C18, 0.4 mL/min, 25 °C. Product peak 7.820 min, purity 96%.



# <Chromatogram>

mAU

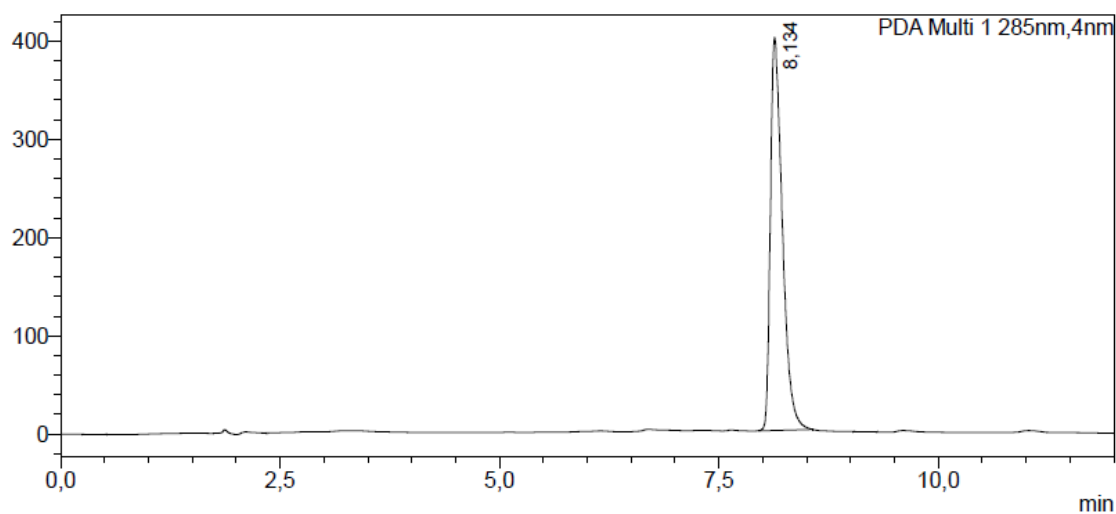

Peak Table

PDA Ch1 285nm

| Peak# | Ret. Time | Area    | Height | Area%   |
|-------|-----------|---------|--------|---------|
| 1     | 8.134     | 3800191 | 399225 | 100.000 |
| Total |           | 3800191 | 399225 | 100.000 |

MS Spectrum

Line#1 R.Time:8,150(Scan#:490)

MassPeaks:655

Spectrum Mode:Single 8,150(490) Base Peak:719(1447291)

BG Mode:None Segment 1 - Event 2

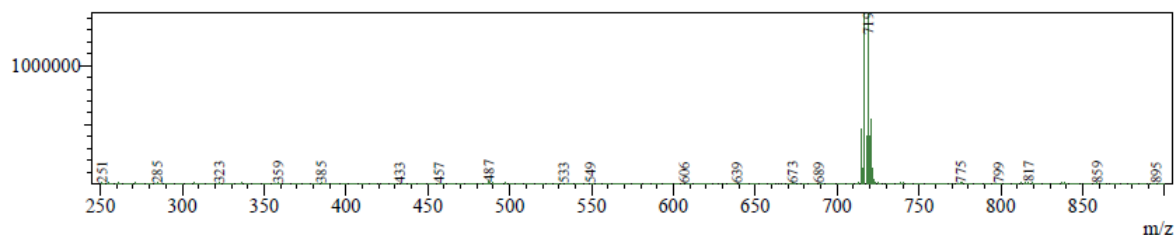

Line#2 R.Time:8,133(Scan#:489)

MassPeaks:659

Spectrum Mode:Single 8,133(489) Base Peak:475(885898)

BG Mode:None Segment 1 - Event 1

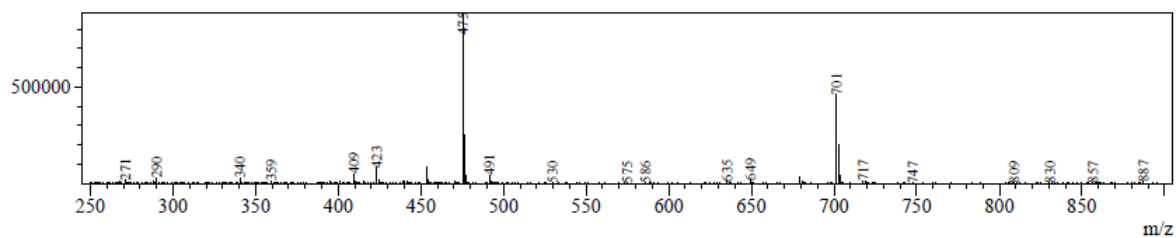

Figure S26. HPLC chromatogram and LC/MS spectra of **6,8,21-tribromosilybin B (22)**

**Figure S26.** HPLC chromatogram and LC/MS spectra of **6,8,21-tribromosilybin B (22)**  
Detected at 285 nm. Chromolith C18, 0.4 mL/min, 25 °C. Product peak 8.134 min, purity 100%.

# <Chromatogram>

mAU

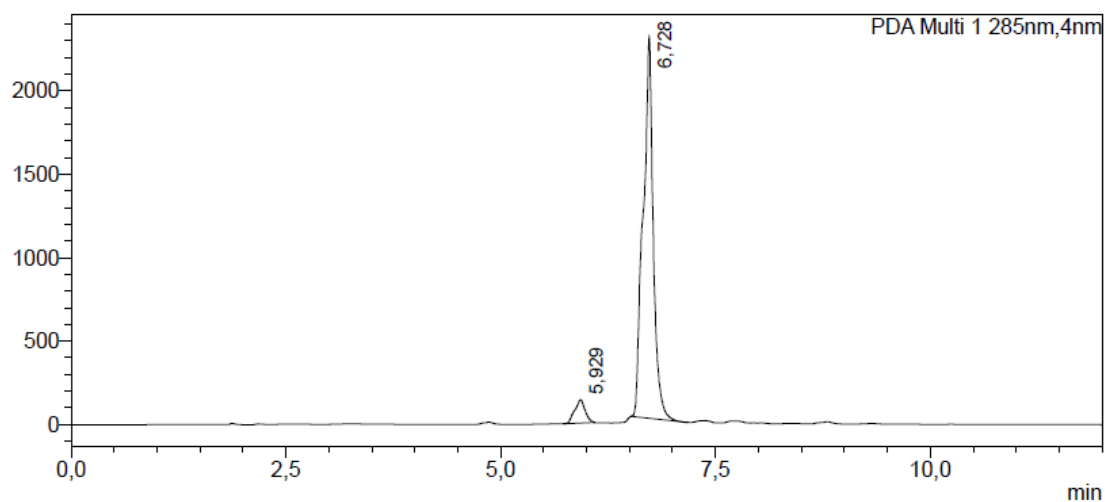

Peak Table

PDA Ch1 285nm

| Peak# | Ret. Time | Area     | Height  | Area%   |
|-------|-----------|----------|---------|---------|
| 1     | 5.929     | 1165923  | 139696  | 5.868   |
| 2     | 6.728     | 18701588 | 2275113 | 94.132  |
| Total |           | 19867511 | 2414810 | 100.000 |

MS Spectrum

Line#:1 R.Time:----(Scan#:----)

MassPeaks:183

Spectrum Mode:Averaged 6.500-7.067(391-425) Base Peak:701(1377205)

BG Mode:Averaged 0.767-2.300(47-139) Segment 1 - Event 1

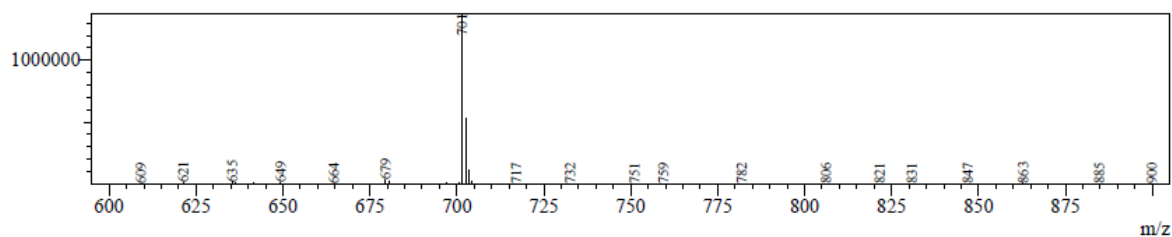

Line#:2 R.Time:----(Scan#:----)

MassPeaks:175

Spectrum Mode:Averaged 6.517-7.083(392-426) Base Peak:719(2986536)

BG Mode:Averaged 0.783-2.317(48-140) Segment 1 - Event 2

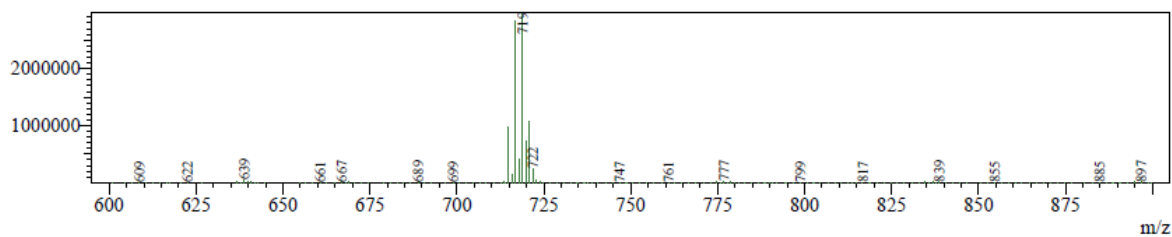

**Figure S27.** HPLC chromatogram and LC/MS spectra of **6,8,20-tribromosilychristin A (23)**. Detected at 285 nm. Chromolith C18, 0.4 mL/min, 25 °C. Product peak 6.728 min, purity 94%. Containing 6% of 6,8-dibromosilychristin A (peak 5.929 min) as an inseparable impurity.

# <Chromatogram>

mAU

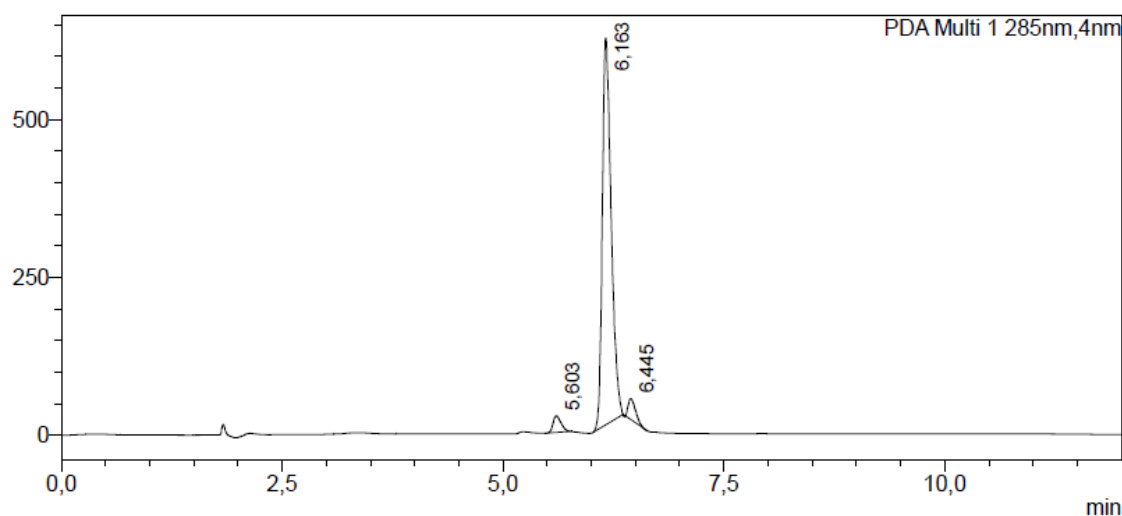

Peak Table

PDA Ch1 285nm

| Peak# | Ret. Time | Area    | Height | Area%   |
|-------|-----------|---------|--------|---------|
| 1     | 5.603     | 165799  | 26206  | 3.578   |
| 2     | 6.163     | 4278886 | 612206 | 92.333  |
| 3     | 6.445     | 189513  | 33027  | 4.089   |
| Total |           | 4634198 | 671439 | 100.000 |

MS Spectrum

Line#1 R.Time:----(Scan#:----)

MassPeaks:240

Spectrum Mode:Averaged 6.183-6.250(372-376) Base Peak:607(3397465)

BG Mode:Calc Segment 1 - Event 2

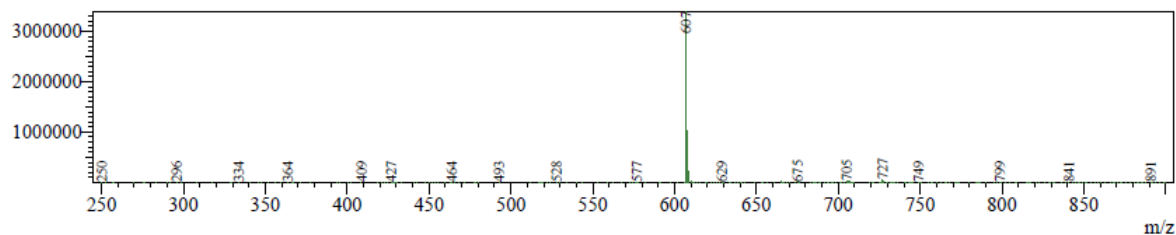

Line#2 R.Time:----(Scan#:----)

MassPeaks:298

Spectrum Mode:Averaged 6.167-6.233(371-375) Base Peak:701(225540)

BG Mode:Calc Segment 1 - Event 1

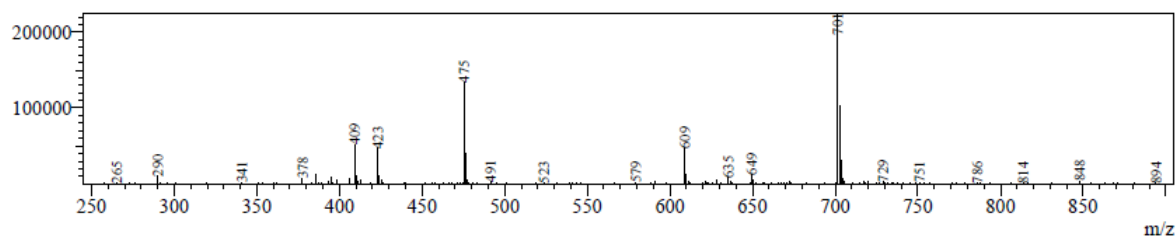

**Figure S28.** HPLC chromatogram and LC/MS spectra of **8-iodosilybin A (24)**. Detected at 285 nm. Chromolith C18, 0.4 mL/min, 25 °C. Product peak 6.163 min, purity 92%. Containing 4% of 6-iodosilychristin A as an inseparable impurity.

# <Chromatogram>

mAU

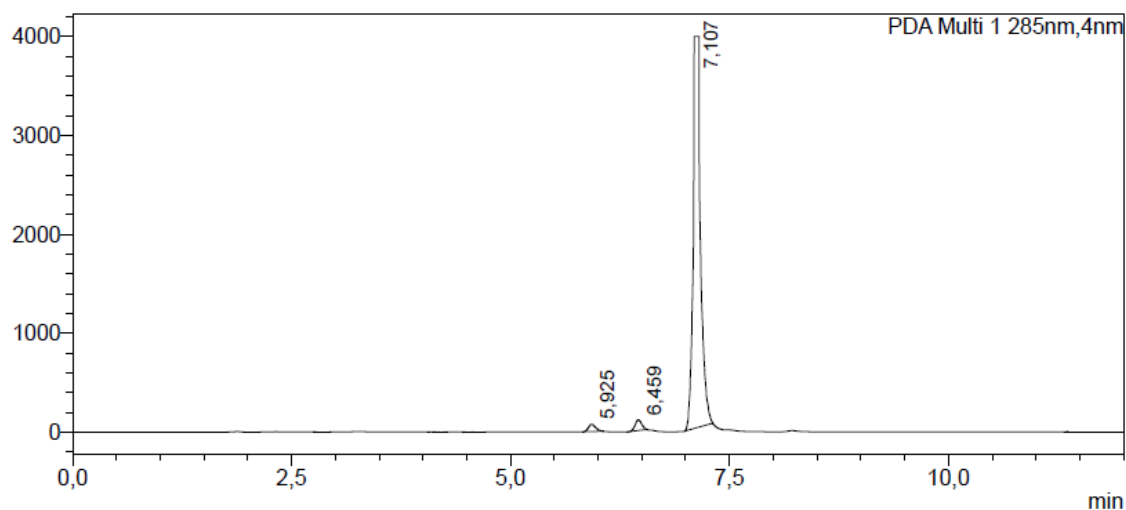

Peak Table

PDA Ch1 285nm

| Peak# | Ret. Time | Area     | Height  | Area%   |
|-------|-----------|----------|---------|---------|
| 1     | 5.925     | 421525   | 74103   | 1.703   |
| 2     | 6.459     | 565604   | 108452  | 2.285   |
| 3     | 7.107     | 23770285 | 3961081 | 96.013  |
| Total |           | 24757413 | 4143636 | 100.000 |

MS Spectrum

Line#:1 R Time:7.200(Scan#:433)

MassPeaks:402

Spectrum Mode:Single 7.200(433) Base Peak:701(1517537)

BG Mode:None Segment 1 - Event 1

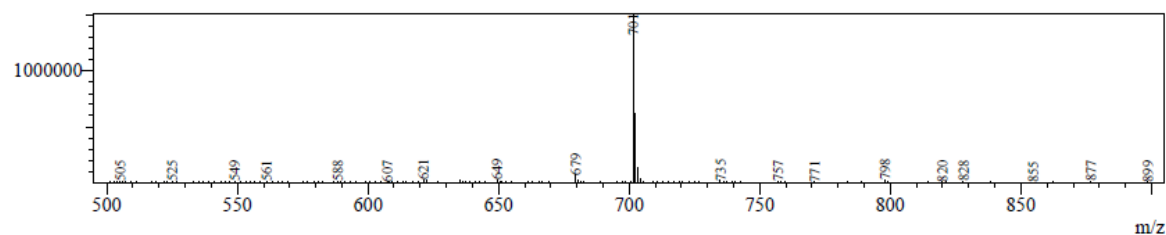

Line#:2 R Time:7.216(Scan#:434)

MassPeaks:399

Spectrum Mode:Single 7.216(434) Base Peak:733(10014770)

BG Mode:None Segment 1 - Event 2

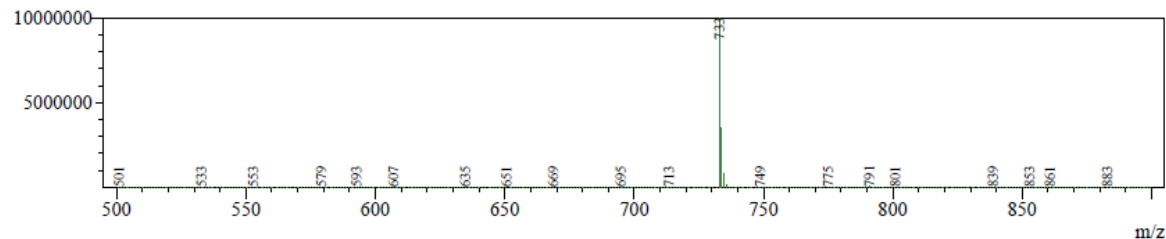

**Figure S29.** HPLC chromatogram and LC/MS spectra of **6,8-diiodosilybin A (25)**. Detected at 285 nm. Chromolith C18, 0.4 mL/min, 25 °C. Product peak 7.107 min, purity 96%.

# <Chromatogram>

mAU

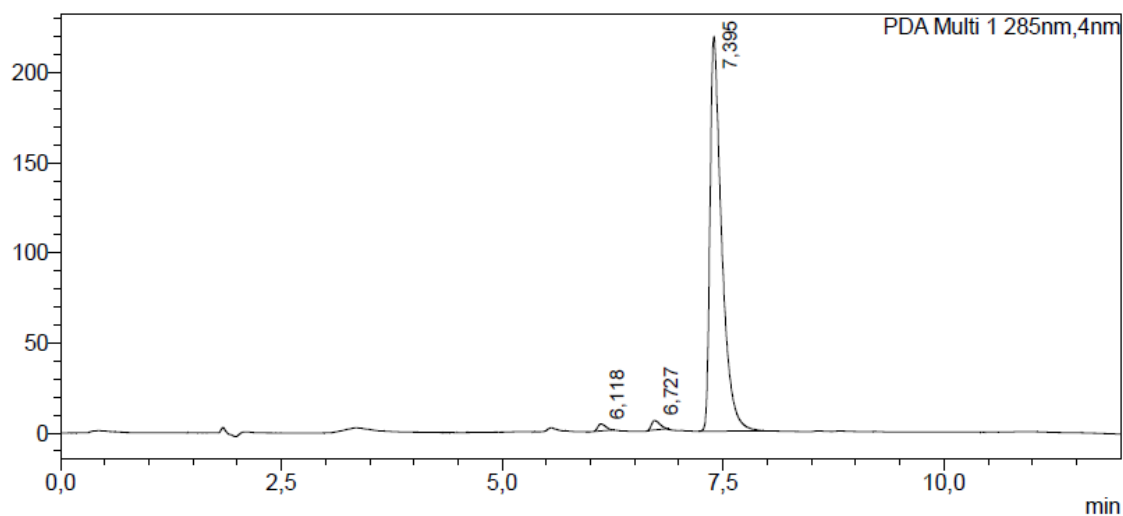

Peak Table

| Peak# | Ret. Time | Area    | Height | Area%   |
|-------|-----------|---------|--------|---------|
| 1     | 6.118     | 23736   | 3817   | 1.145   |
| 2     | 6.727     | 34399   | 5197   | 1.659   |
| 3     | 7.395     | 2014874 | 218746 | 97.196  |
| Total |           | 2073008 | 227761 | 100.000 |

MS Spectrum

Line#:1 R.Time:7.483(Scan#:450)  
MassPeaks:651  
Spectrum Mode:Single 7.483(450) Base Peak:733(2807433)  
BG Mode:None Segment 1 - Event 2

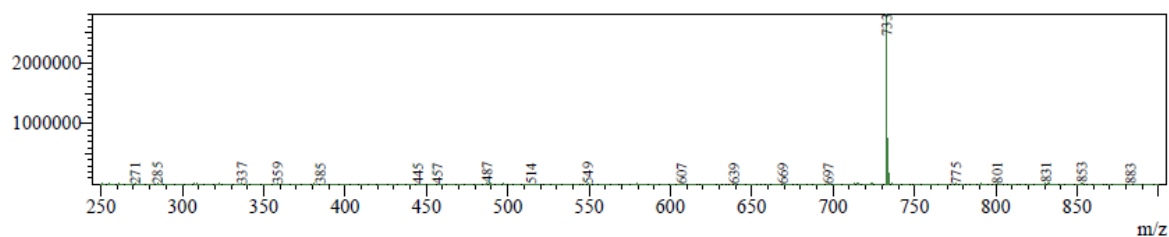

Line#:2 R.Time:7.467(Scan#:449)  
MassPeaks:660  
Spectrum Mode:Single 7.467(449) Base Peak:475(1076152)  
BG Mode:None Segment 1 - Event 1

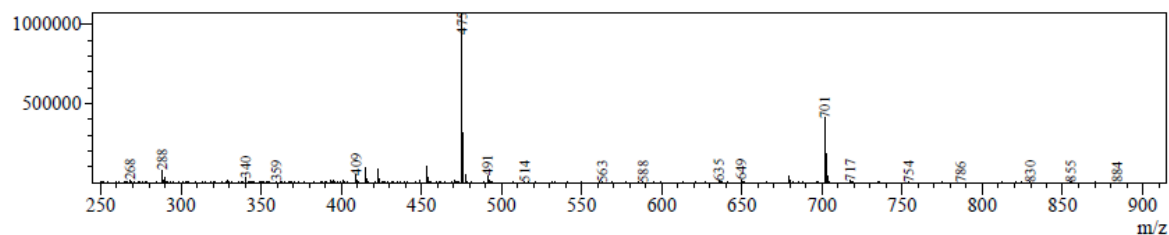

**Figure S30.** HPLC chromatogram and LC/MS spectra of **6,8-diiodosilybin B (26)**. Detected at 285 nm. Chromolith C18, 0.4 mL/min, 25 °C. Product peak 7.395 min, purity 97%.

# <Chromatogram>

mAU

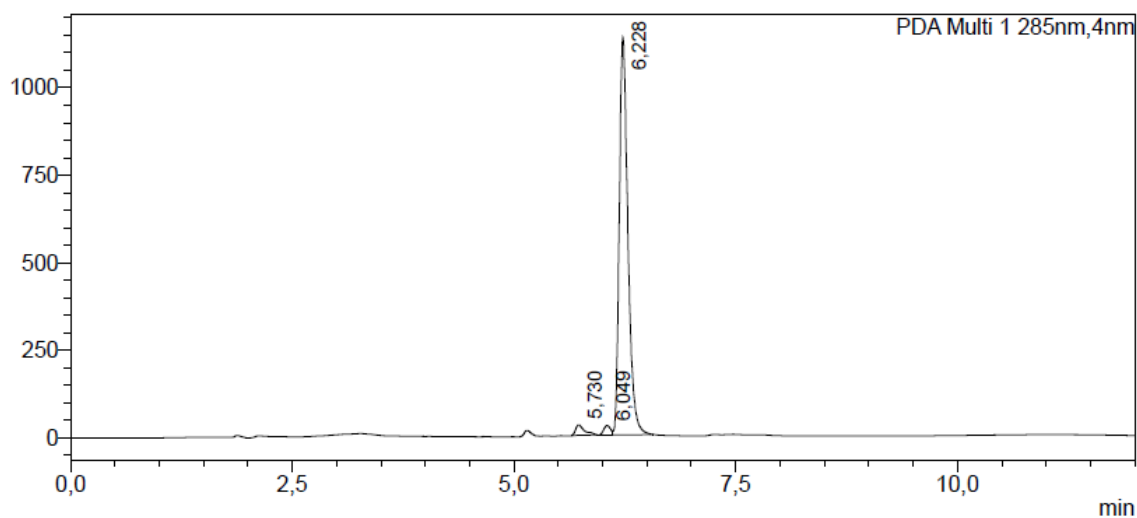

Peak Table

PDA Ch1 285nm

| Peak# | Ret. Time | Area    | Height  | Area%   |
|-------|-----------|---------|---------|---------|
| 1     | 5.730     | 209385  | 30275   | 2.610   |
| 2     | 6.049     | 136398  | 26490   | 1.700   |
| 3     | 6.228     | 7676722 | 1132515 | 95.690  |
| Total |           | 8022505 | 1189281 | 100.000 |

MS Spectrum

Line#:1 R.Time:6,250(Scan#:376)  
MassPeaks:514  
Spectrum Mode:Single 6,250(376) Base Peak:733(7251052)  
BG Mode:None Segment 1 - Event 2

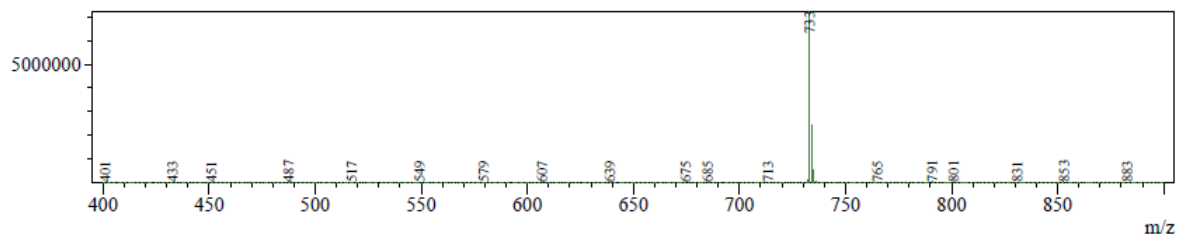

Line#:2 R.Time:6,233(Scan#:375)  
MassPeaks:502  
Spectrum Mode:Single 6,233(375) Base Peak:475(380314)  
BG Mode:None Segment 1 - Event 1

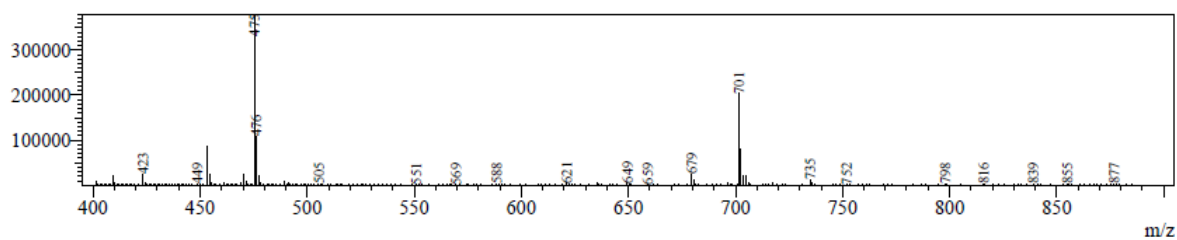

**Figure S31.** HPLC chromatogram and LC/MS spectra of **6,8-diiodosilychristin A (27)**  
Detected at 285 nm. Chromolith C18, 0.4 mL/min, 25 °C. Product peak 6.228 min, purity 96%.

# <Chromatogram>

mAU

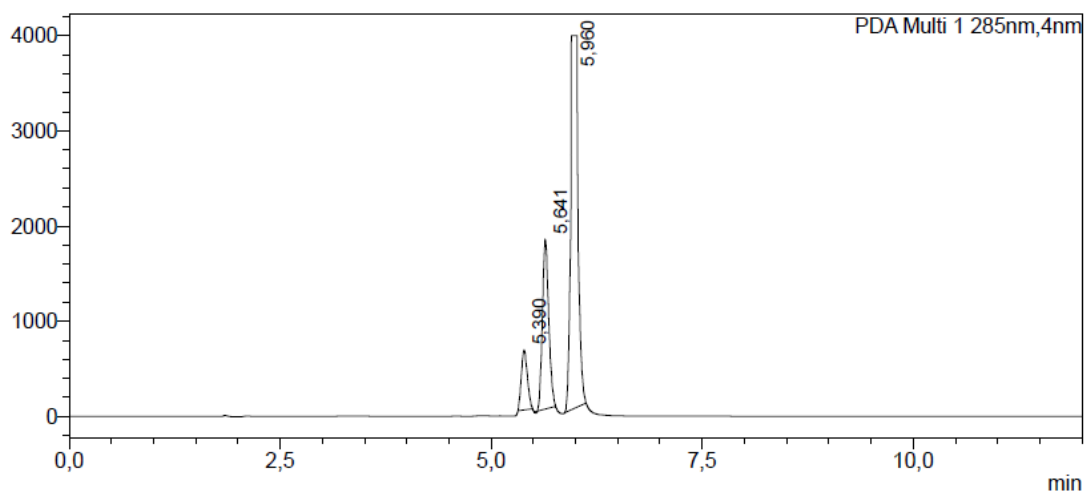

Peak Table

PDA Ch1 285nm

| Peak# | Ret. Time | Area     | Height  | Area%   |
|-------|-----------|----------|---------|---------|
| 1     | 5.390     | 3114869  | 626078  | 8.519   |
| 2     | 5.641     | 9274287  | 1771639 | 25.365  |
| 3     | 5.960     | 24174833 | 3926659 | 66.117  |
| Total |           | 36563989 | 6324376 | 100.000 |

MS Spectrum

Line#:1 R.Time:6.017(Scan#:362)

MassPeaks:201

Spectrum Mode:Single 6.017(362) Base Peak:515(8807137)

BG Mode:None Segment 1 - Event 2

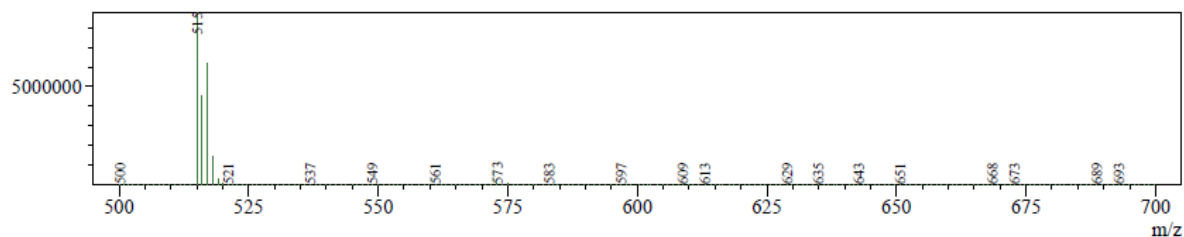

Line#:2 R.Time:6.000(Scan#:361)

MassPeaks:201

Spectrum Mode:Single 6.000(361) Base Peak:517(30929)

BG Mode:None Segment 1 - Event 1

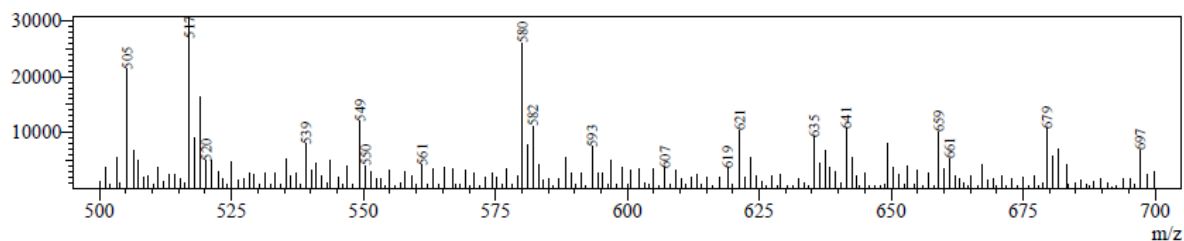

**Figure S32.** HPLC chromatogram and LC/MS spectra of **6-chlorosilybin B (28a)** and **8-chlorosilybin B (28b)**. Detected at 285 nm. Chromolith C18, 0.4 mL/min, 25 °C. The product was isolated as a mixture containing 8-chlorosilybin B (peak 5.641 min, 25%), 6-chlorosilybin B (peak 5.960 min, 66%), and silybin B (peak 5.390 min, 9%).

## HRMS Analysis

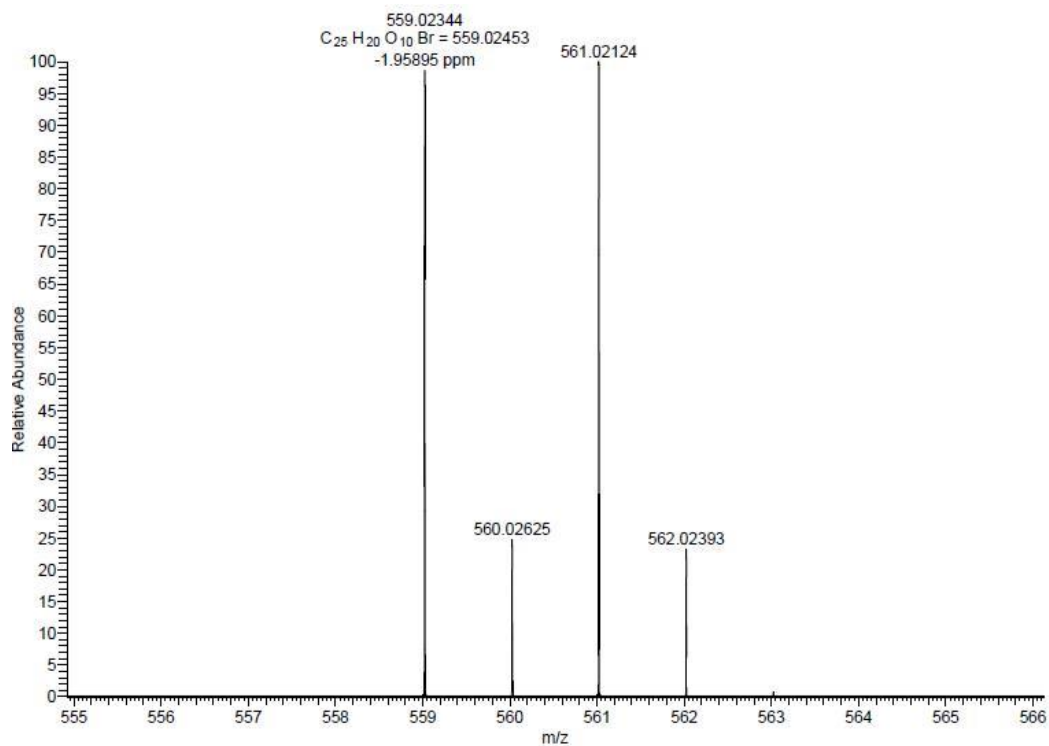

**Figure S33.** HRMS (ESI-) analysis of **8-bromosilybin A (19)**. Calculated for C<sub>25</sub>H<sub>20</sub>O<sub>10</sub>Br  $m/z$  559.02453, measured 559.02344 (-1.95895 ppm).

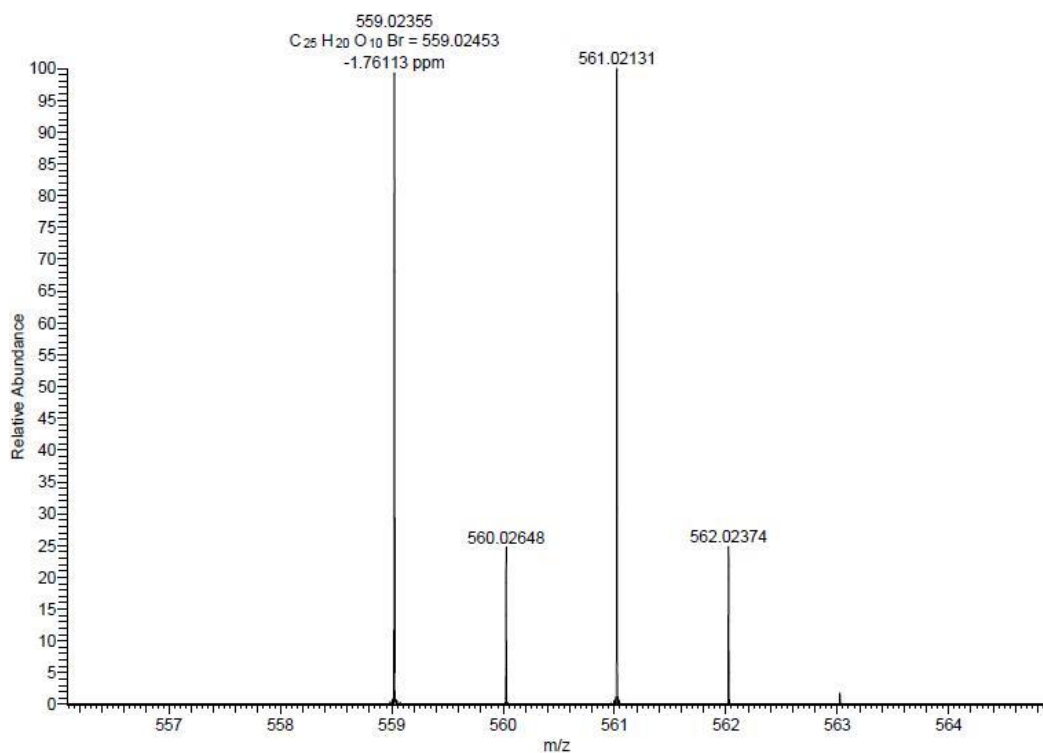

**Figure S34.** HRMS (ESI-) analysis of **8-bromosilybin B (20)**. Calculated for C<sub>25</sub>H<sub>20</sub>O<sub>10</sub>Br  $m/z$  559.02453, measured 559.02355 (-1.76113 ppm).



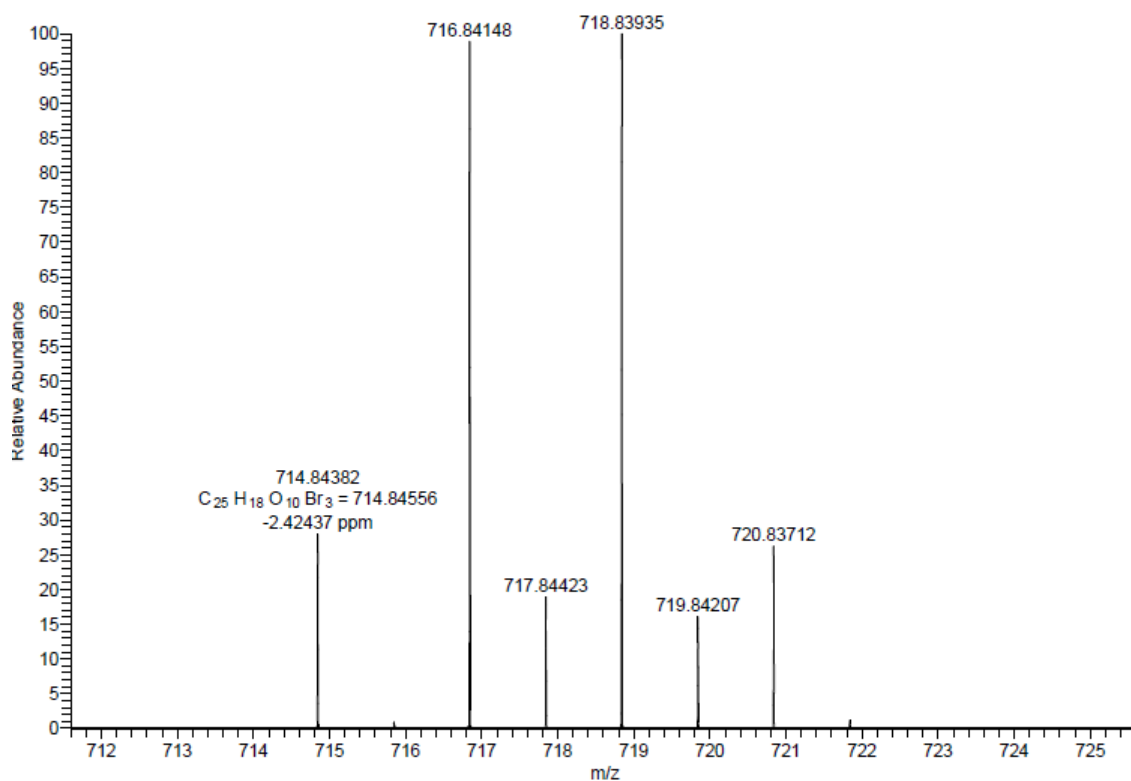

**Figure S35.** HRMS (ESI-) analysis of **6,8,21-tribromosilybin A (21)**. Calculated for  $C_{25}H_{18}O_{10}^{79}Br_3$   $m/z$  714.84556, measured 714.84382 (-2.42437 ppm).

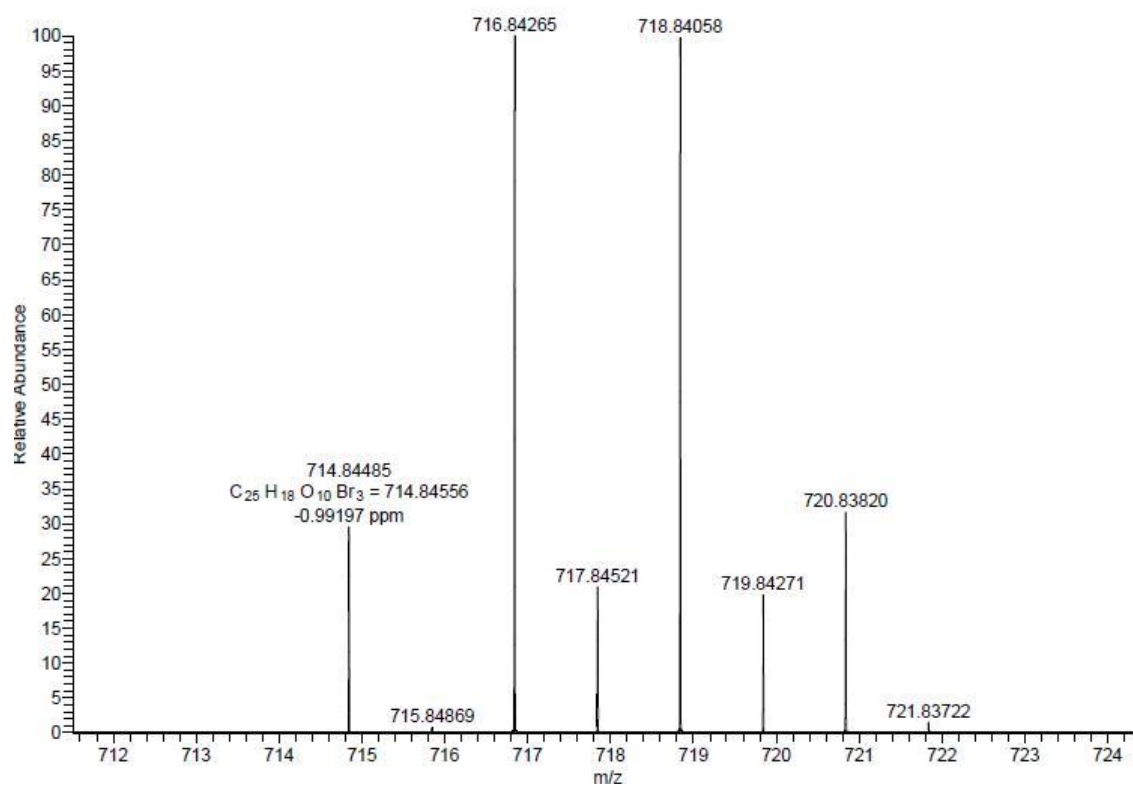

**Figure S36.** HRMS (ESI-) analysis of **6,8,21-tribromosilybin B (22)**.  $C_{25}H_{18}O_{10}^{79}Br_3$   $m/z$  714.84556, measured 714.84485 (-0.99197 ppm).

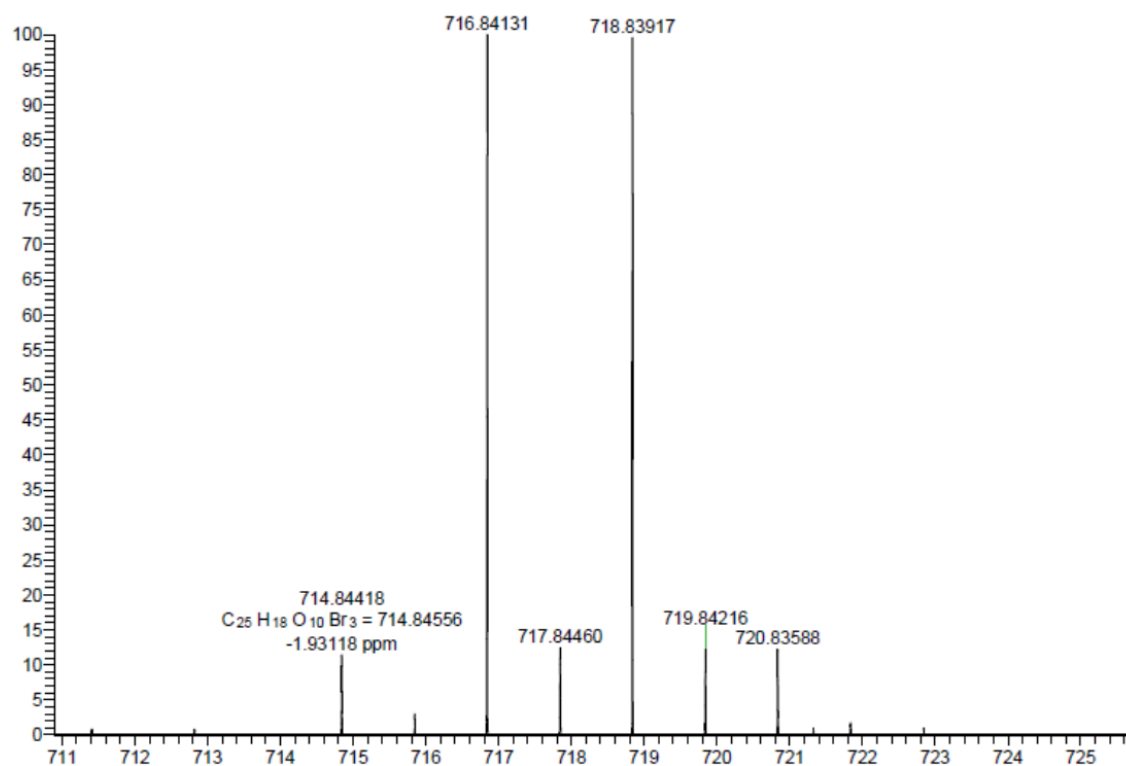

**Figure S37.** HRMS (ESI-) analysis of 6,8,20-tribromosilychristin A (23).  $C_{25}H_{18}O_{10}Br_3$   $m/z$  714.84556, measured 714.84418 (-1.93118 ppm).

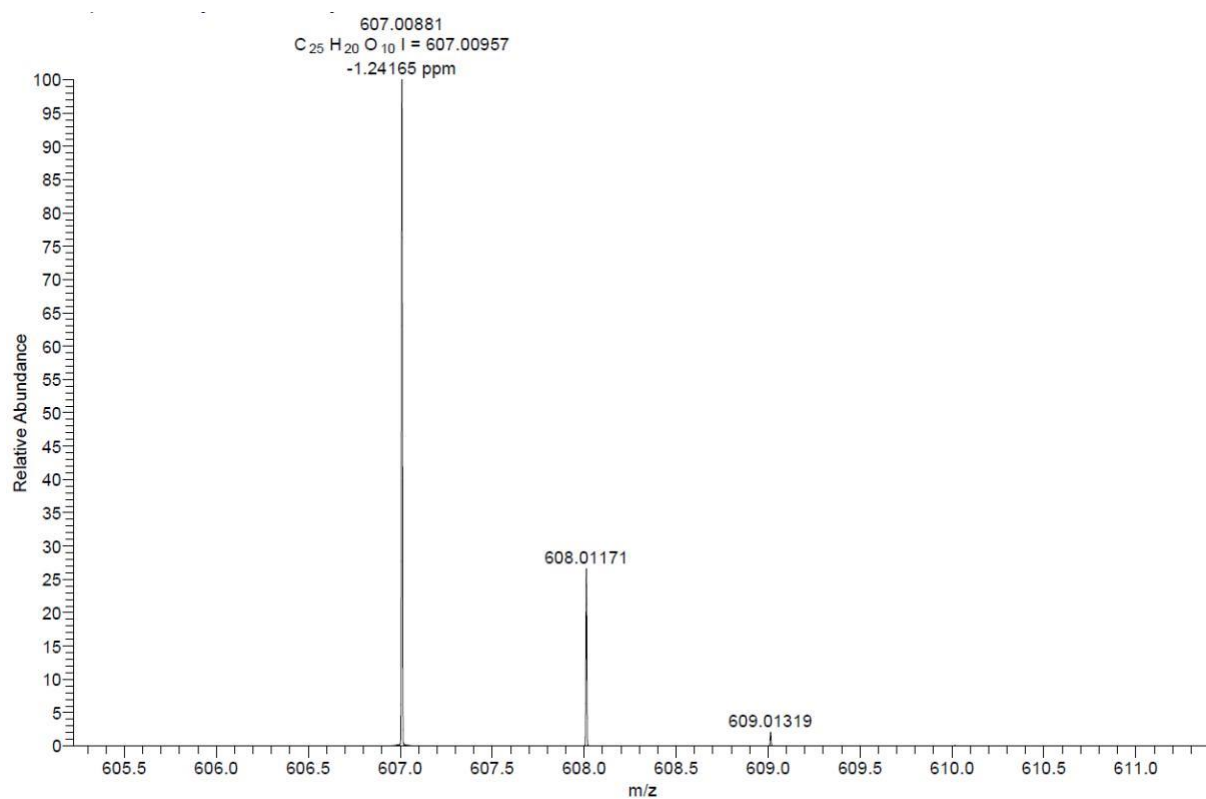

**Figure S38.** HRMS (ESI-) analysis of 8-iodosilybin (24).  $C_{25}H_{20}O_{10}I$   $m/z$  607.00957, measured 607.00881 (-1.24165 ppm).

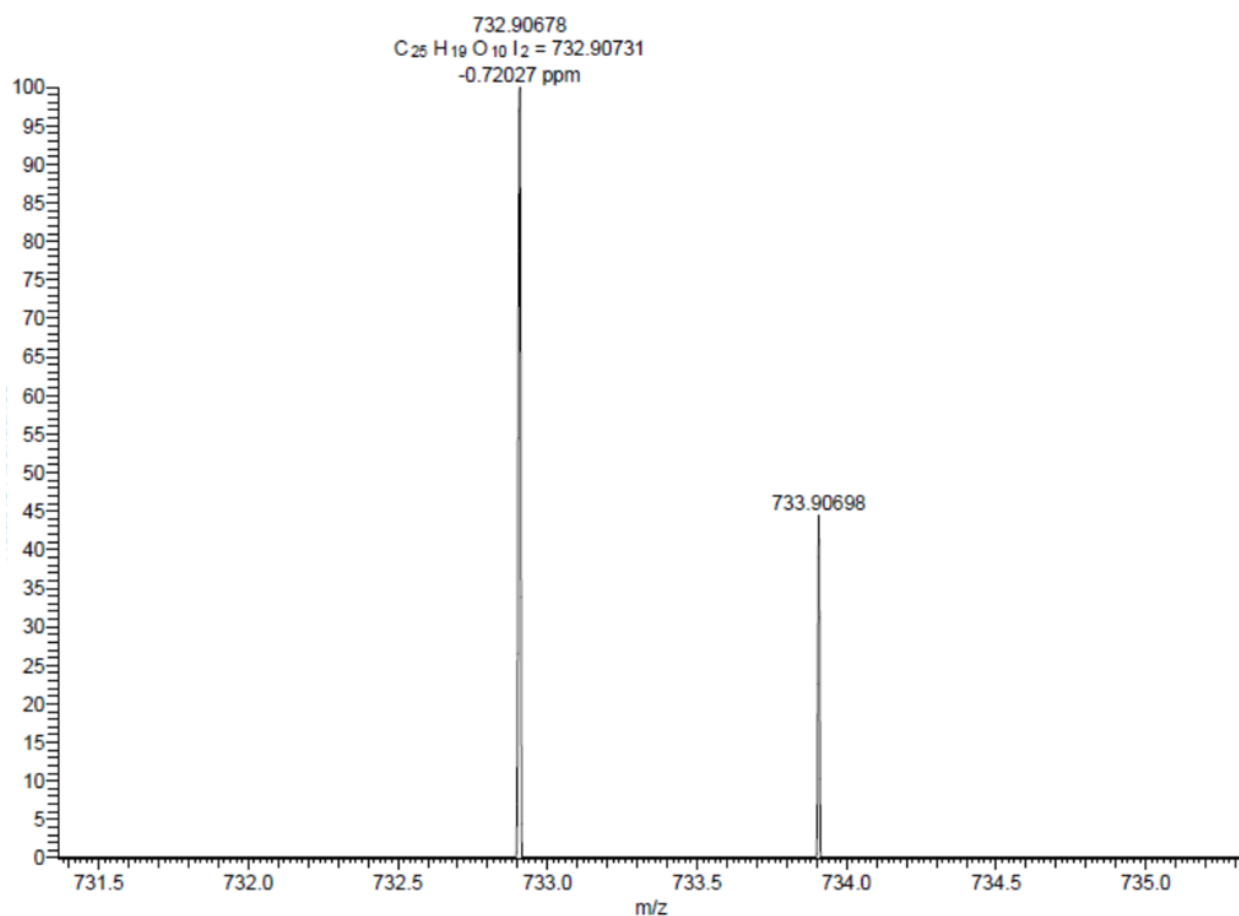

**Figure S39.** HRMS (ESI-) analysis of **6,8-diiodosilybin A (25)**. C<sub>25</sub>H<sub>19</sub>O<sub>10</sub>I<sub>2</sub> *m/z* 732.90731, measured 732.90678 (-0.72027 ppm).

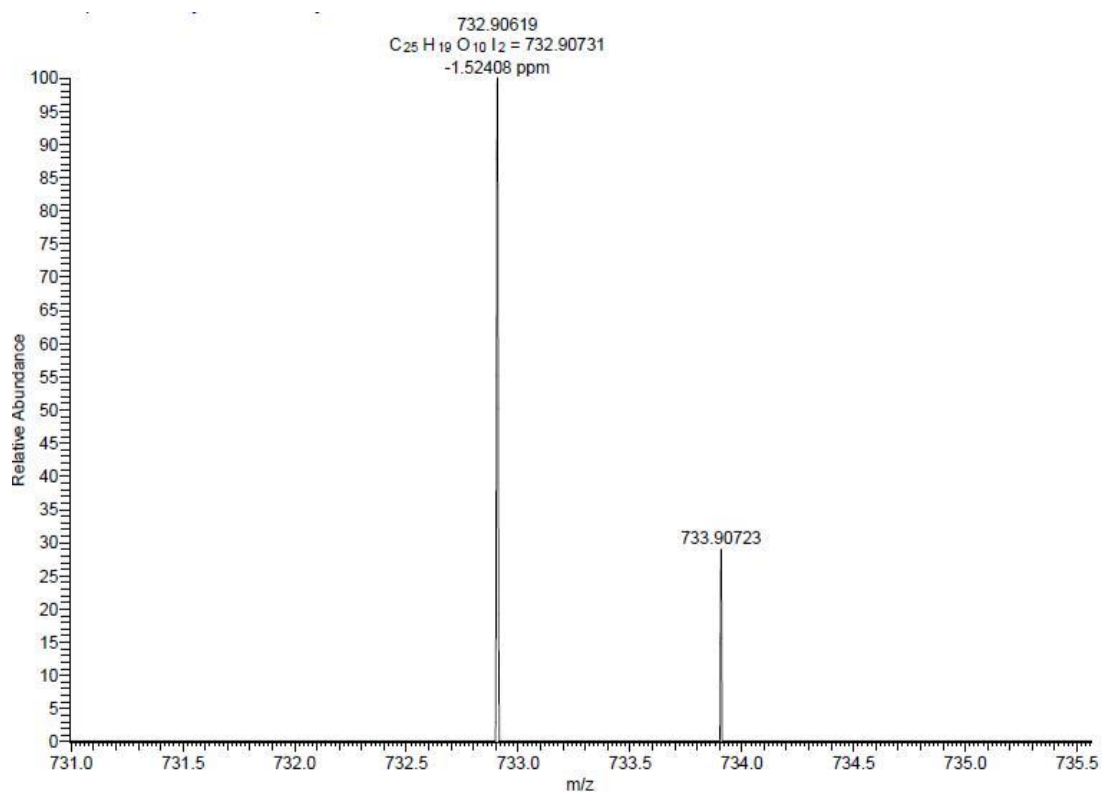

**Figure S40.** HRMS (ESI-) analysis of **6,8-diiodosilybin B (26)**. C<sub>25</sub>H<sub>19</sub>O<sub>10</sub>I<sub>2</sub> *m/z* 732.90731, measured 732.90619 (-1.52408 ppm).

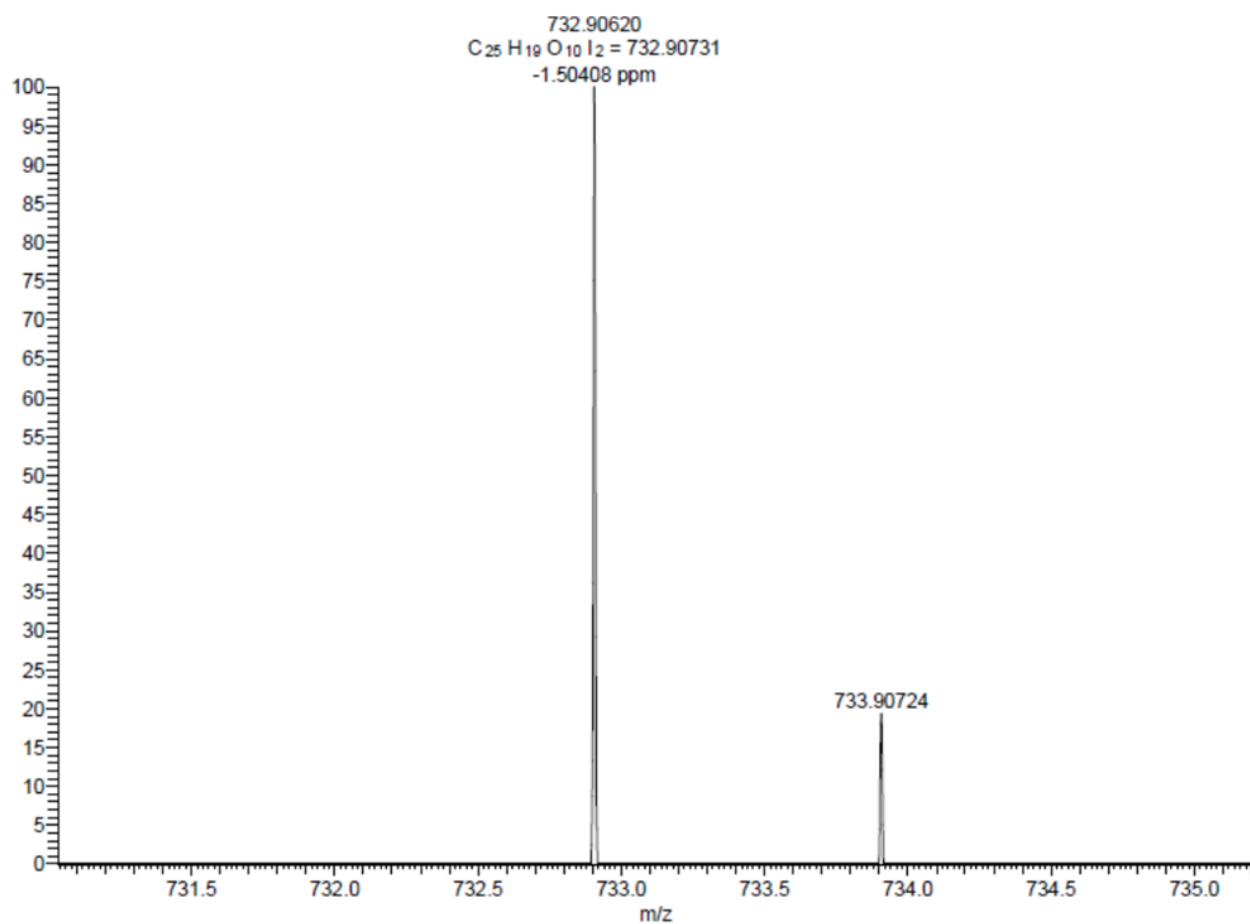

**Figure S41.** HRMS (ESI-) analysis of **6,8-diiodosilychristin A (27)**.  $C_{25}H_{19}O_{10}I_2$   $m/z$  732.90731, measured 732.90620 (-1.50408 ppm).

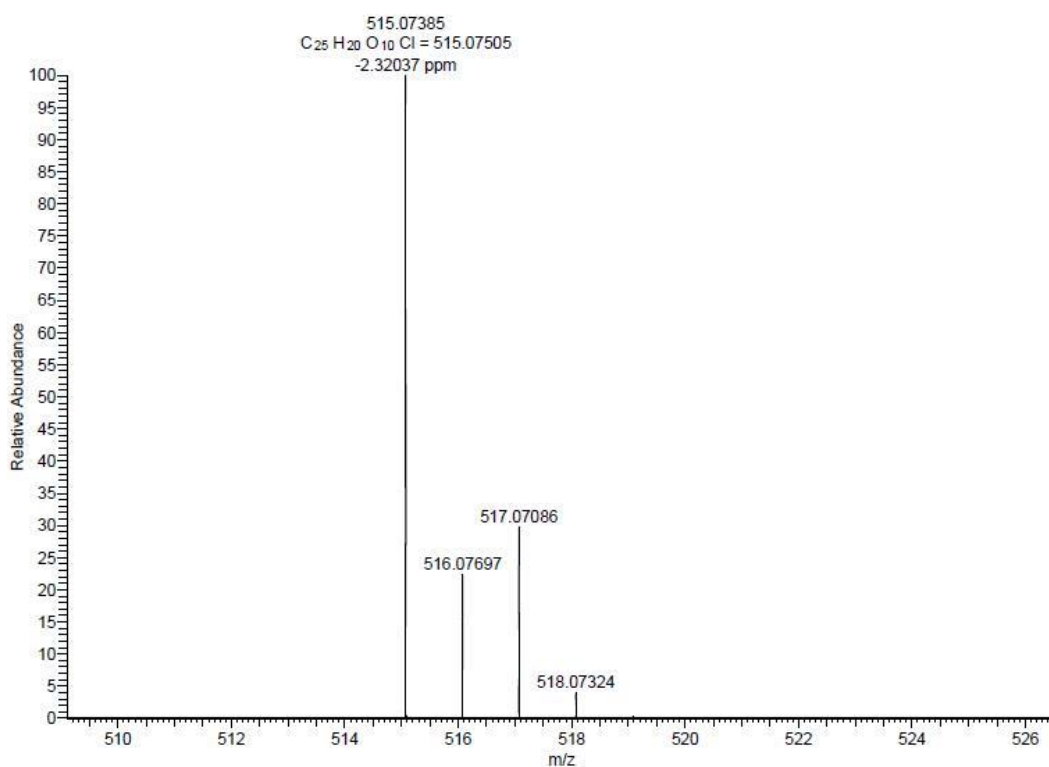

**Figure S42.** HRMS (ESI-) analysis of **6-chlorosilybin B (28a)** and **8-chlorosilybin B (28b)**.  $C_{25}H_{20}O_{10}Cl$   $m/z$  515.07505, measured 515.07385 (-2.32037 ppm).
